# Supplementary material for: Imidazole as organocatalyst for multicomponent reactions: diversity oriented synthesis of functionalized hetero- and carbocycles using in situ-generated benzylidenemalononitrile derivatives
Source: Royal Society of Chemistry journal article supplement (doi:10.1039/c3ra45252b), 2013-10-24

## Supporting Information for:

### **Imidazole as organocatalyst for multicomponent reactions: Diversity oriented synthesis of functionalized hetero and carbocycles using in situ-generated benzylidenemalononitrile derivatives**

*Md. Nasim Khan, Suman Pal, Shaik Karamthulla and Lokman H. Choudhury\**  
*Department of Chemistry, Indian Institute of Technology Patna, Bihar-800 013, India*

Corresponding author's E-mail: [lokman@iitp.ac.in](mailto:lokman@iitp.ac.in)

## Table of Content

Copies of  $^1\text{H}$  and  $^{13}\text{C}$  NMR spectra of all Compounds 2S-32S

$^1\text{H}$  and  $^{13}\text{C}$  NMR spectra for **1aa**

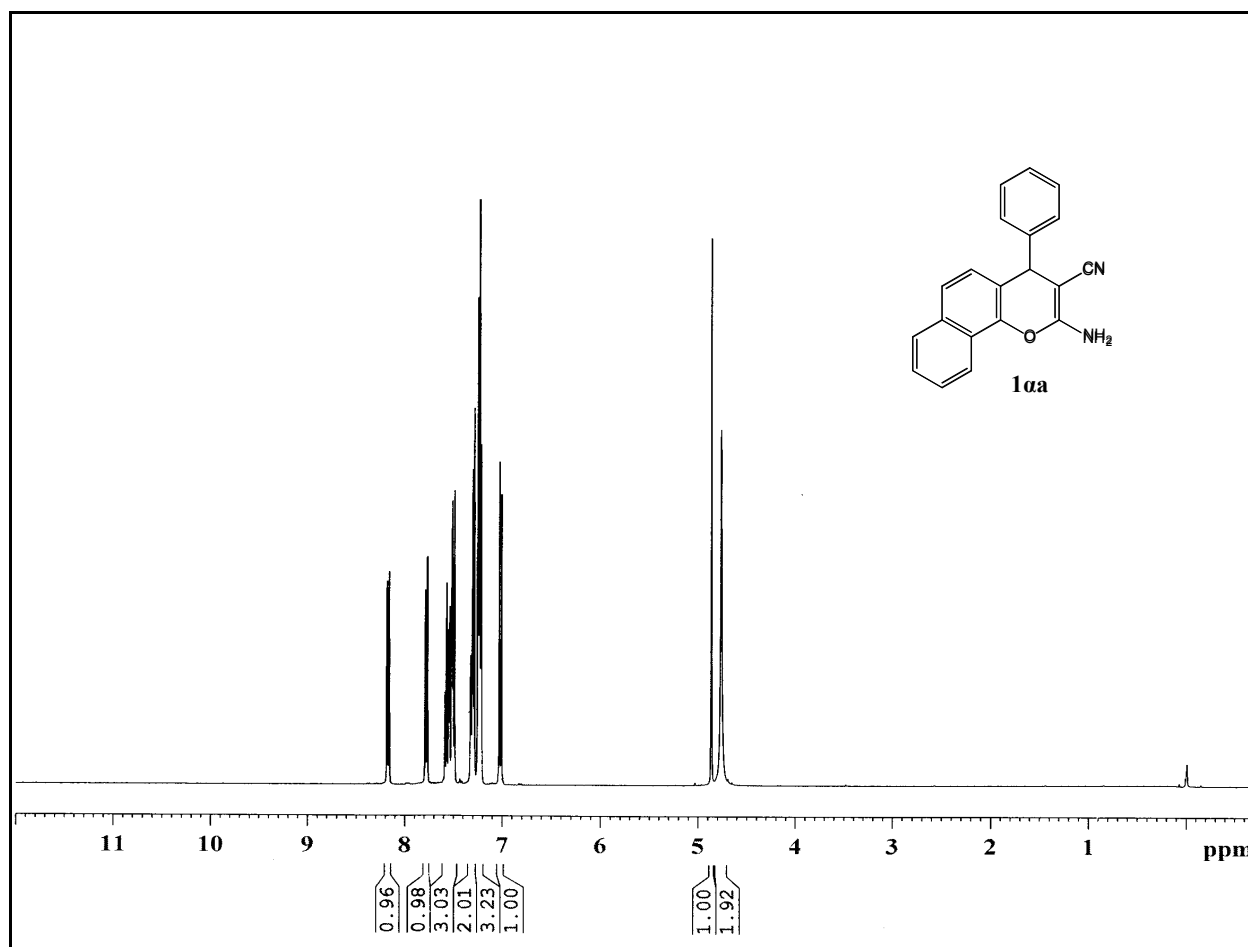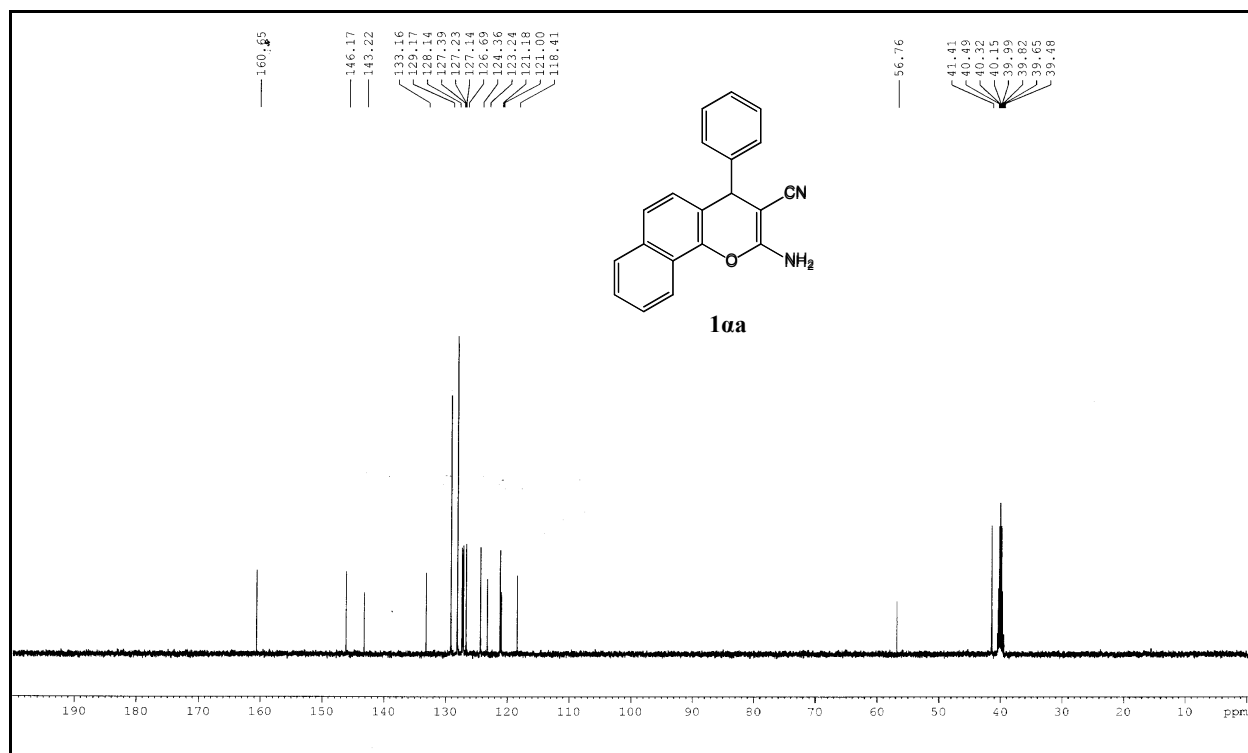

$^1\text{H}$  and  $^{13}\text{C}$  NMR spectra for **1ab**

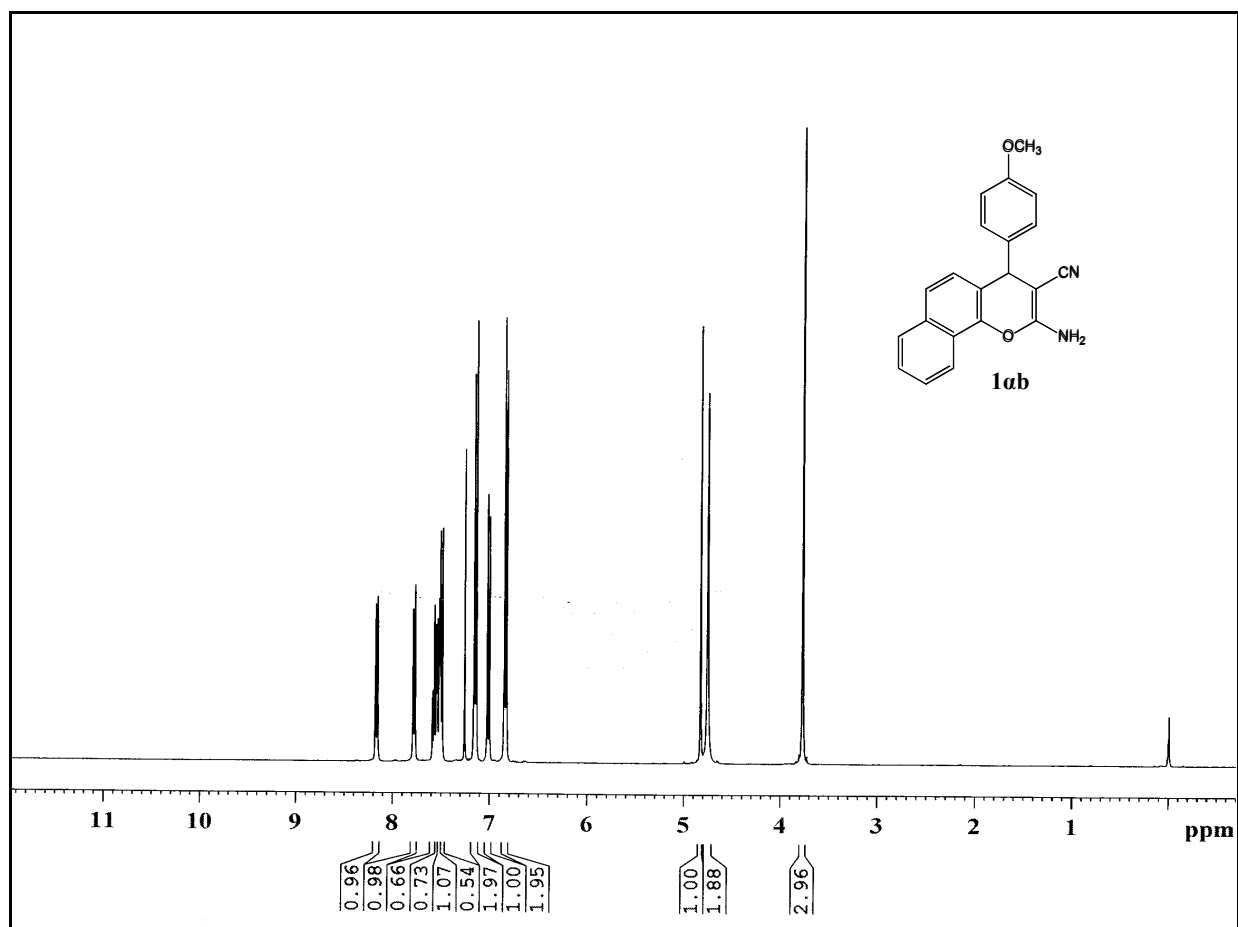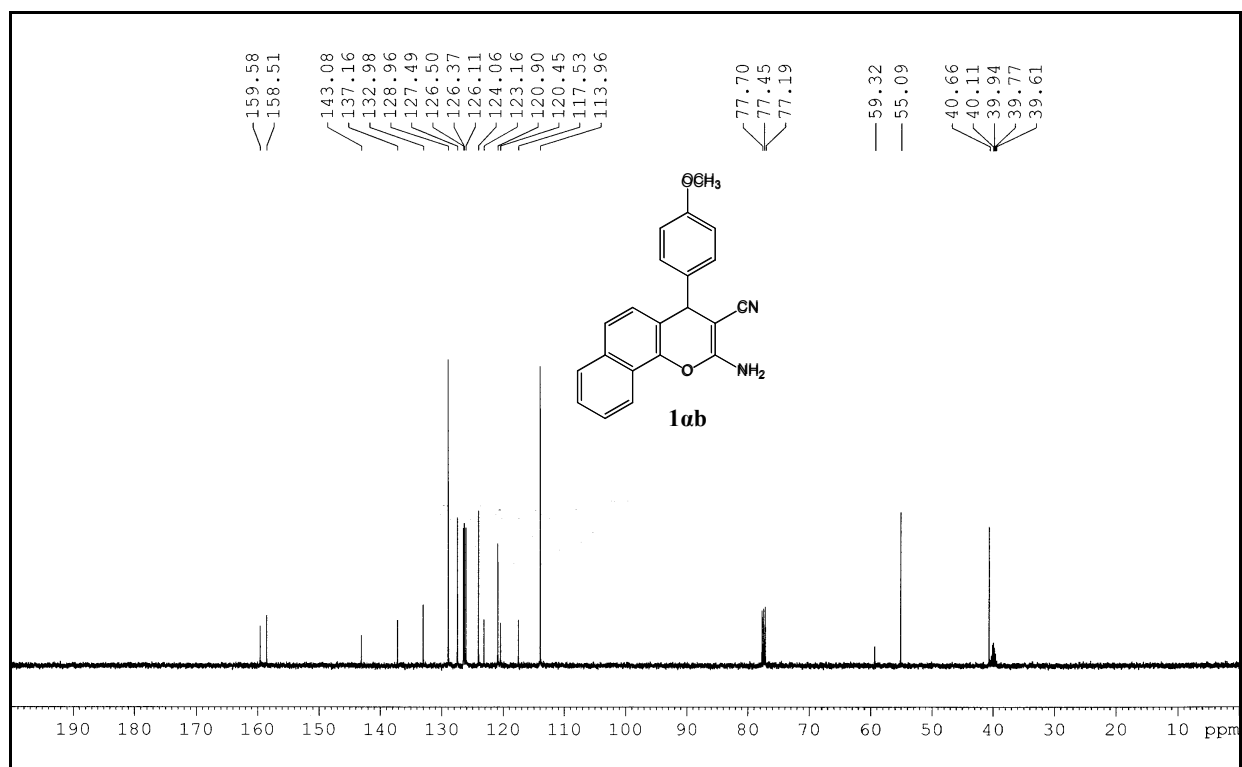

$^1\text{H}$  and  $^{13}\text{C}$  NMR spectra for **1ac**

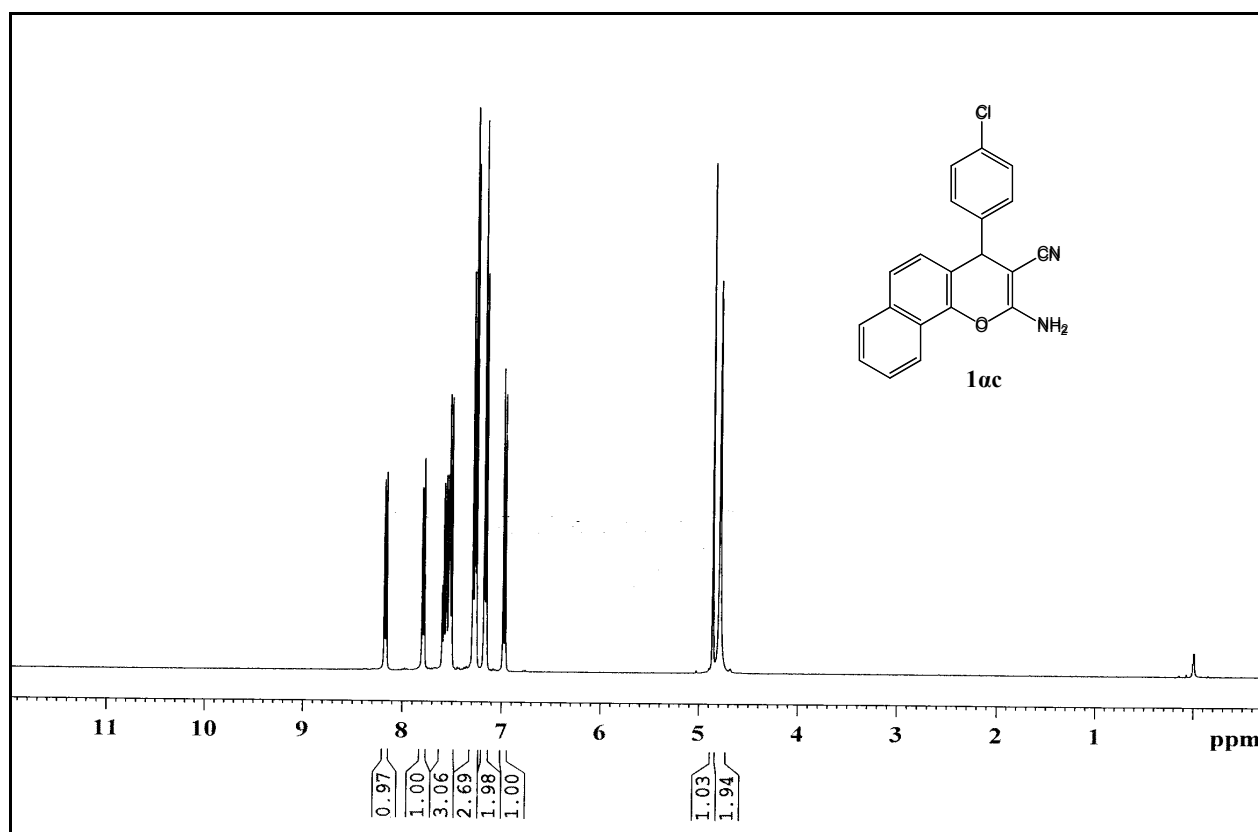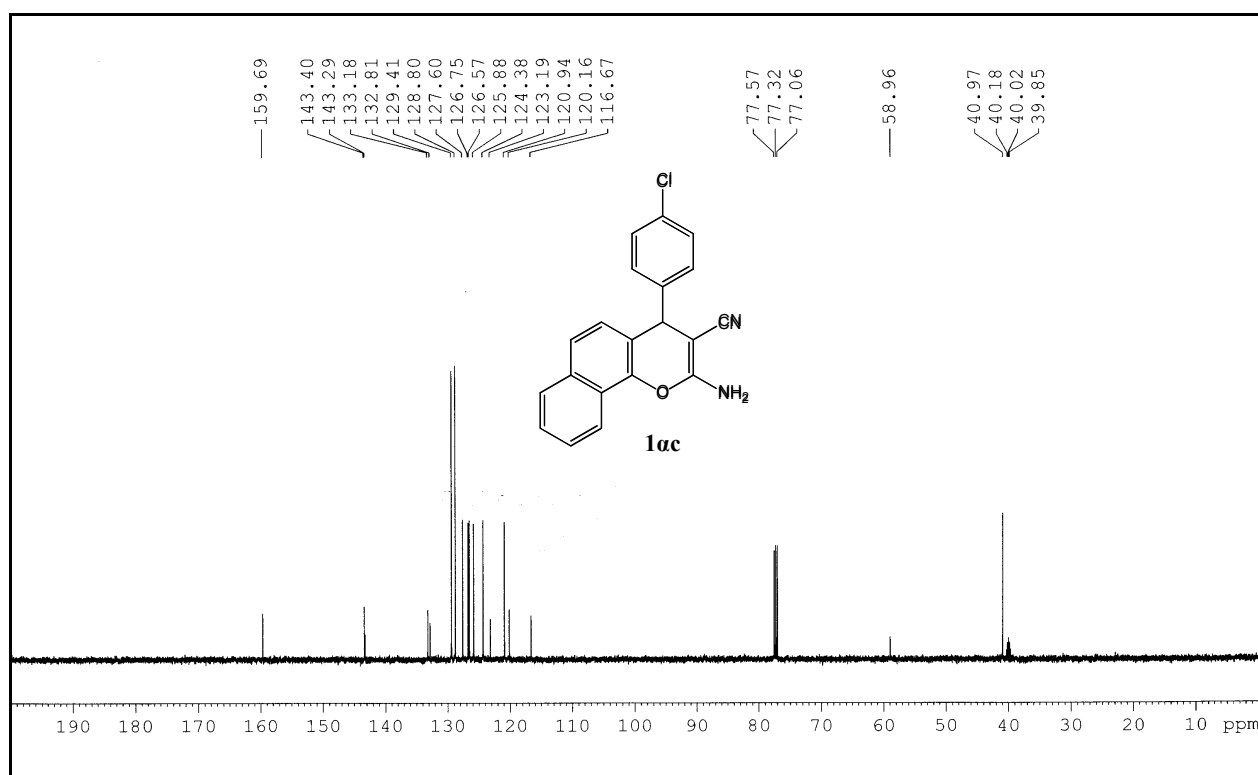

$^1\text{H}$  and  $^{13}\text{C}$  NMR spectra for **1ad**

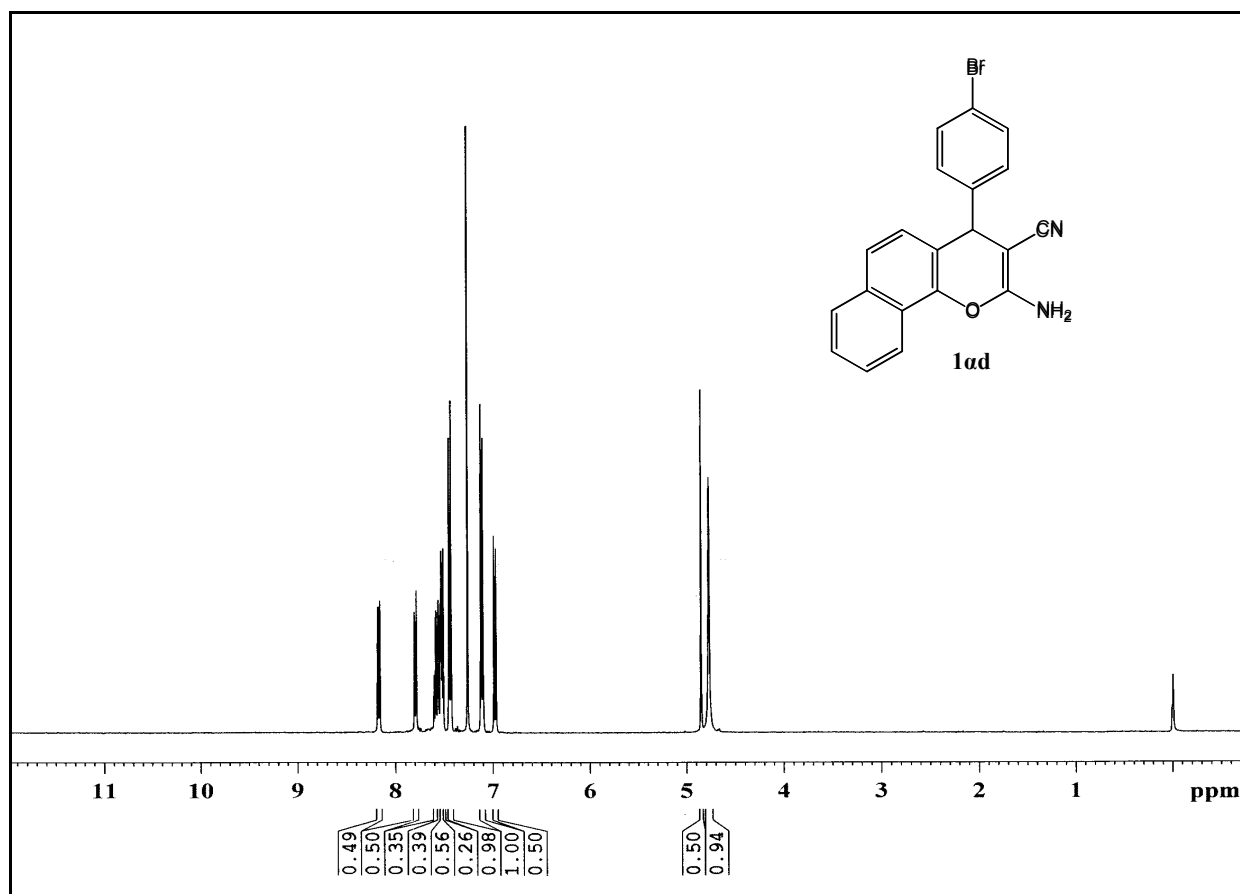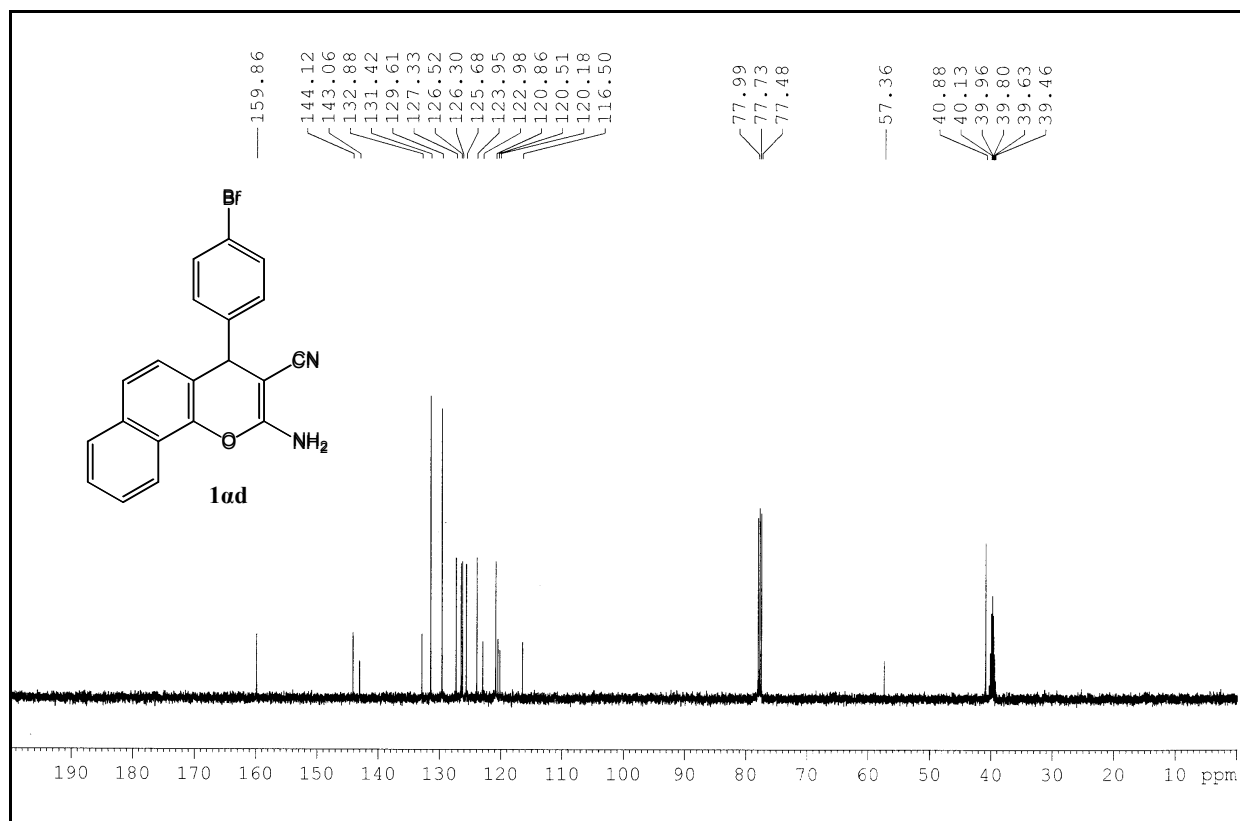

$^1\text{H}$  and  $^{13}\text{C}$  NMR spectra for **1 $\beta$ a**

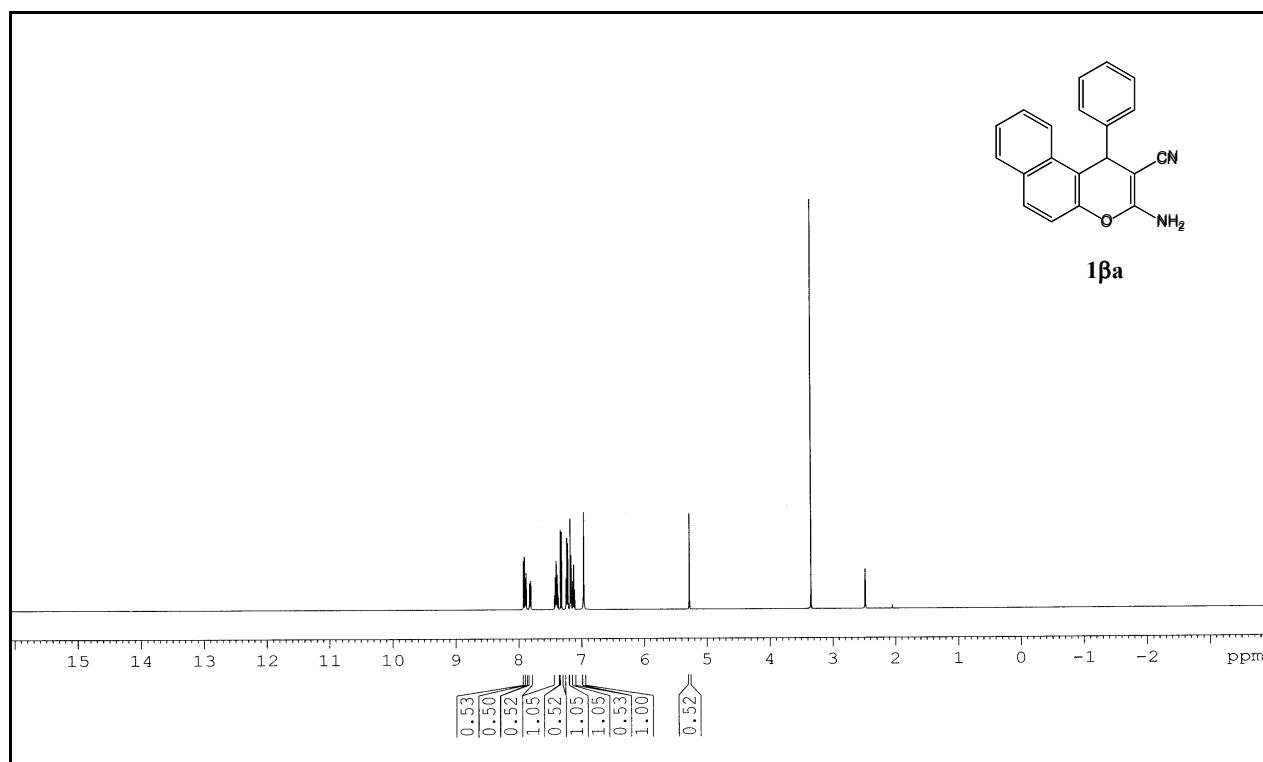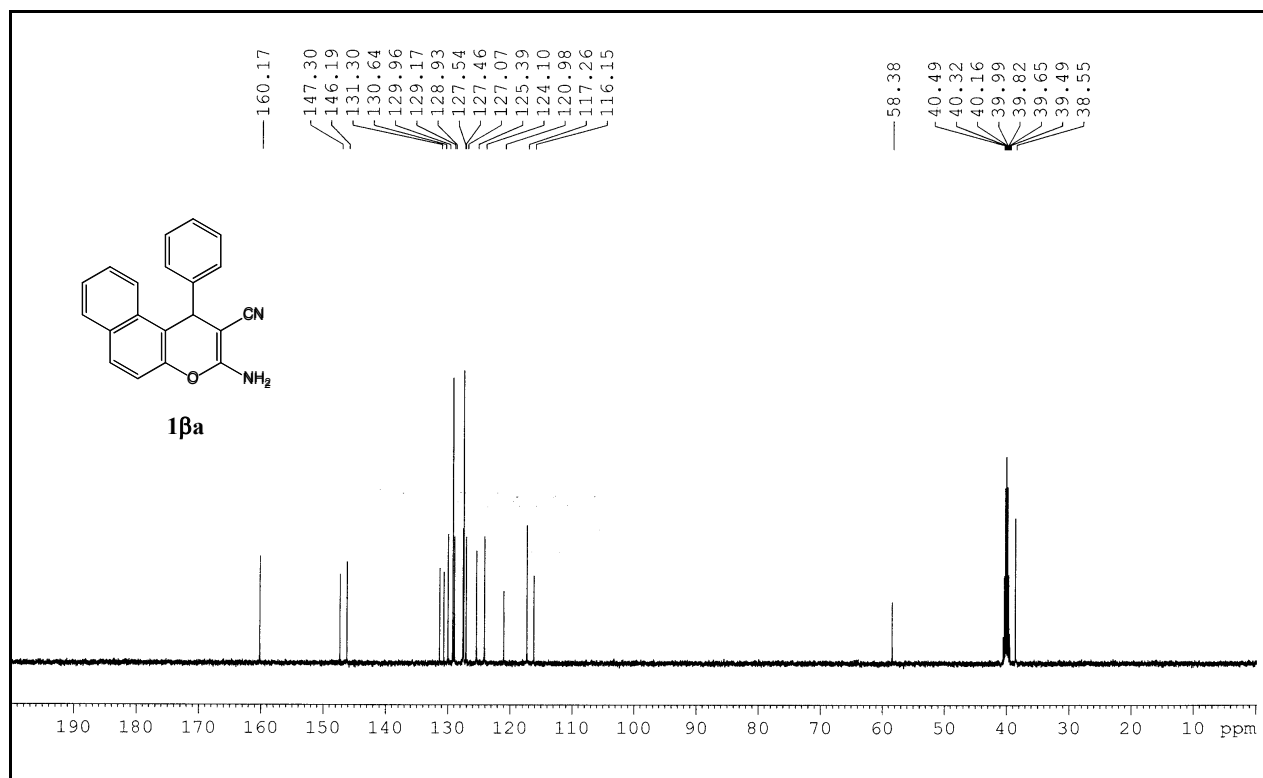

$^1\text{H}$  and  $^{13}\text{C}$  NMR spectra for **1 $\beta$ b**

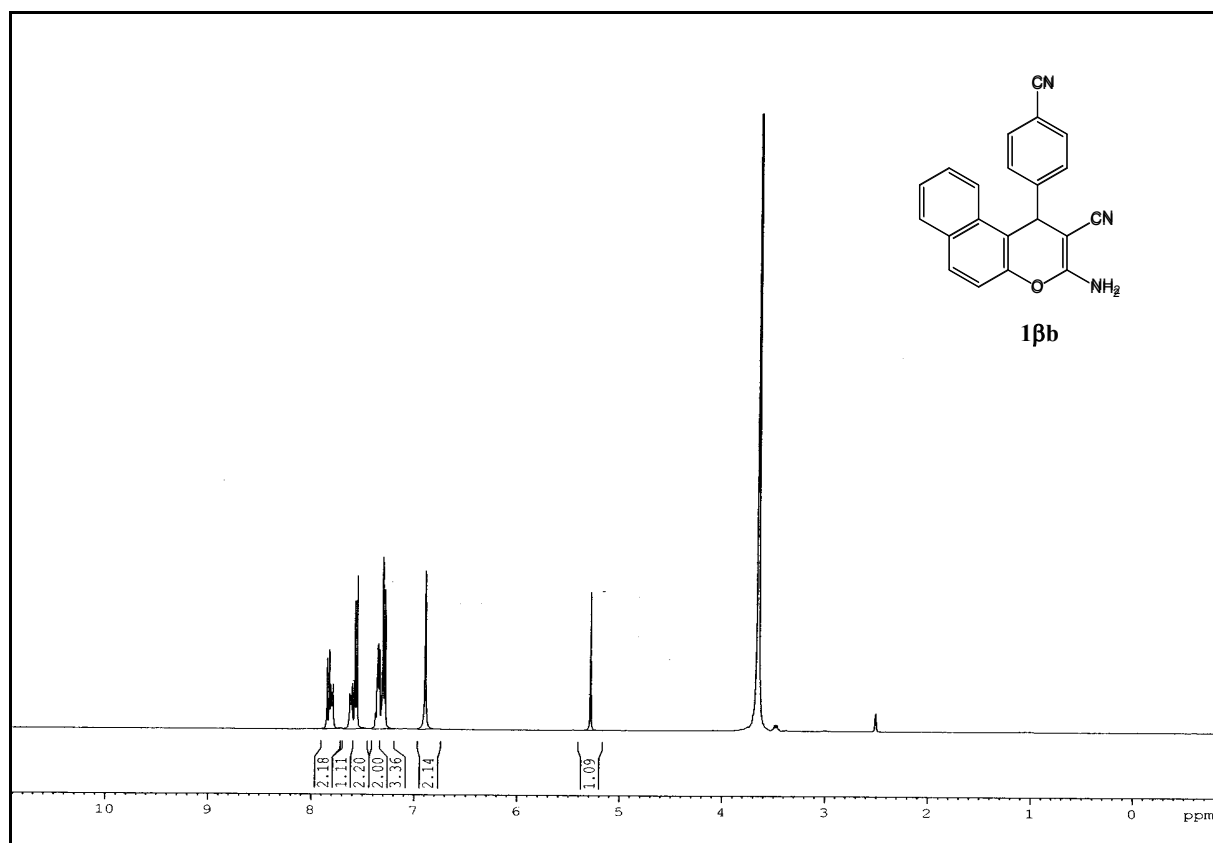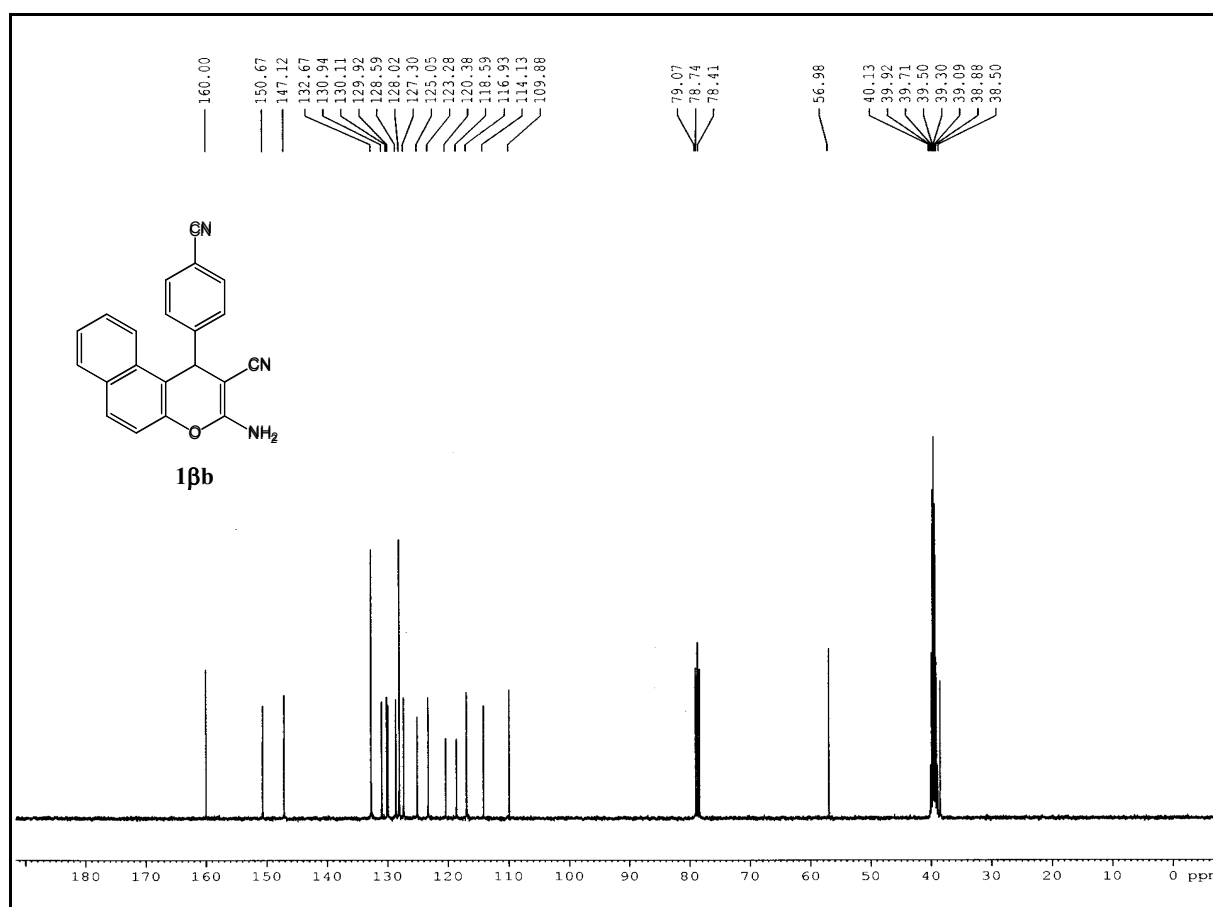

$^1\text{H}$  and  $^{13}\text{C}$  NMR spectra for **1βc**

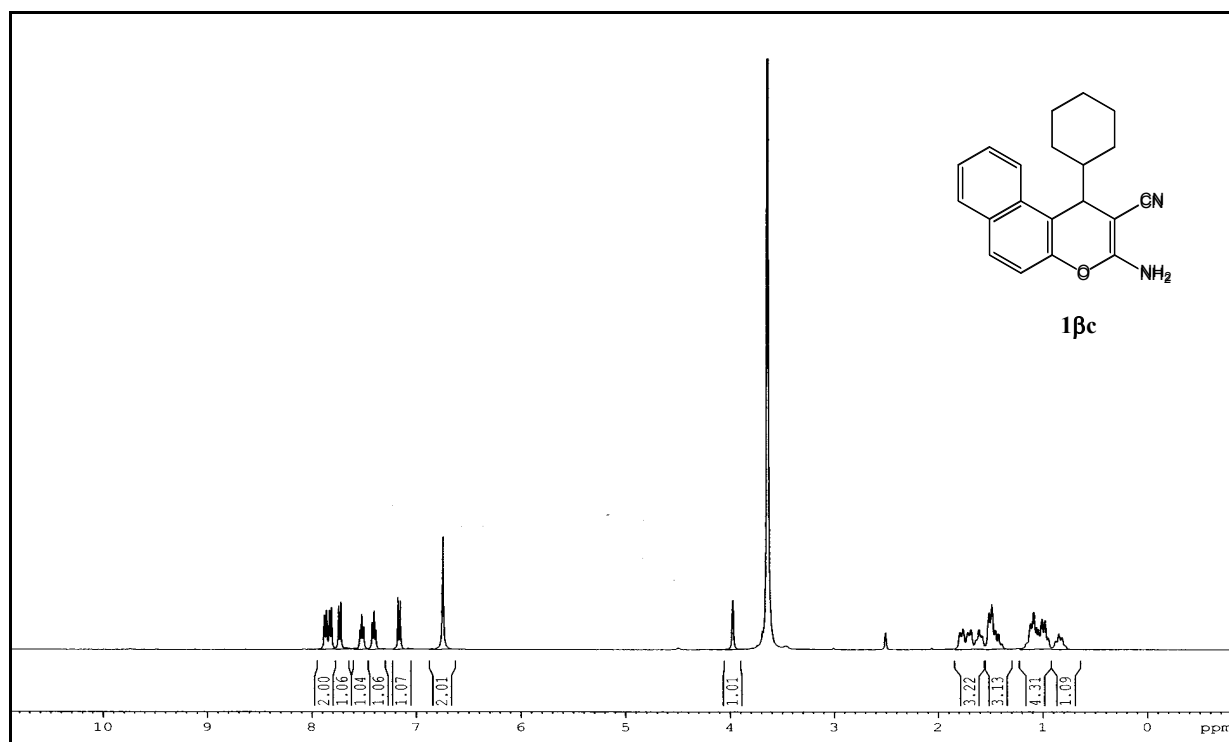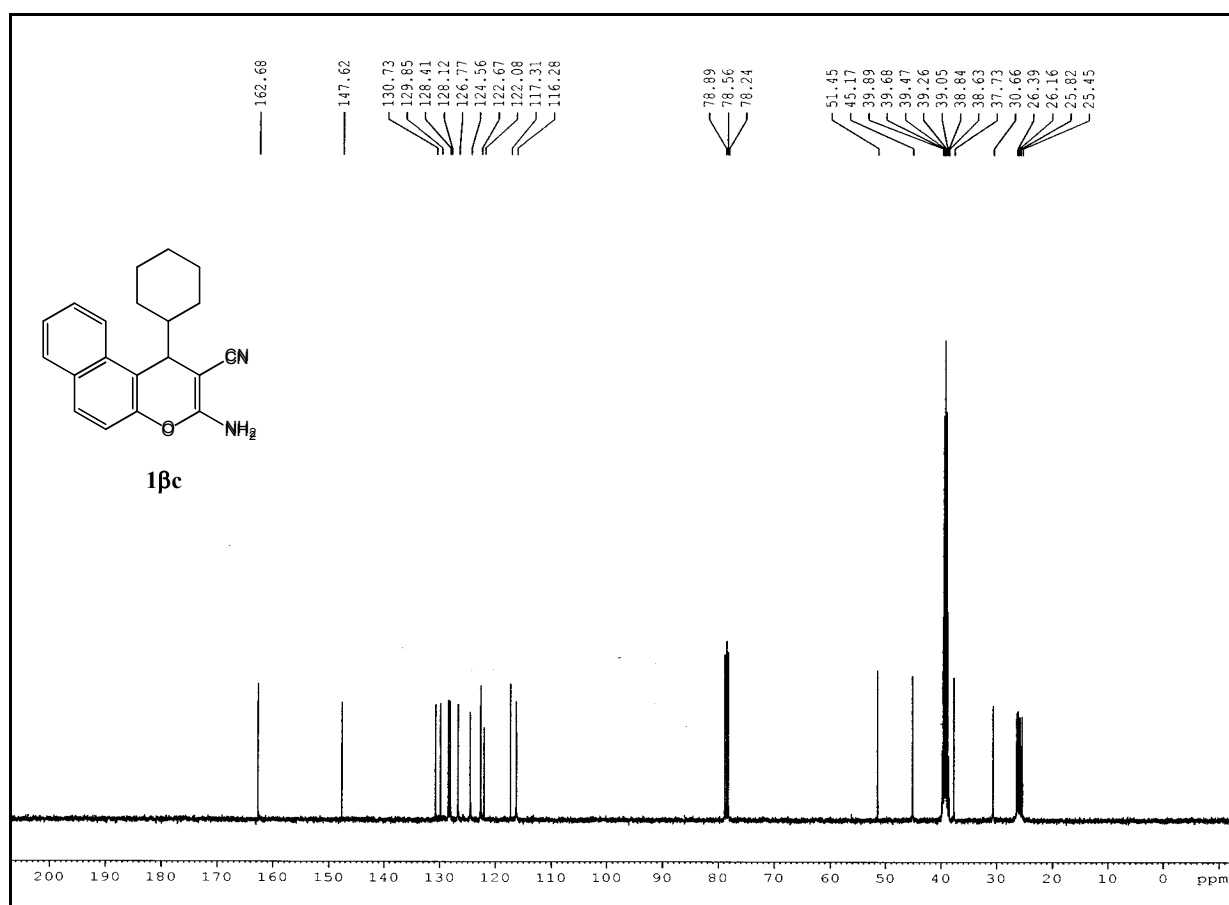



$^1\text{H}$  and  $^{13}\text{C}$  NMR spectra for **2a**

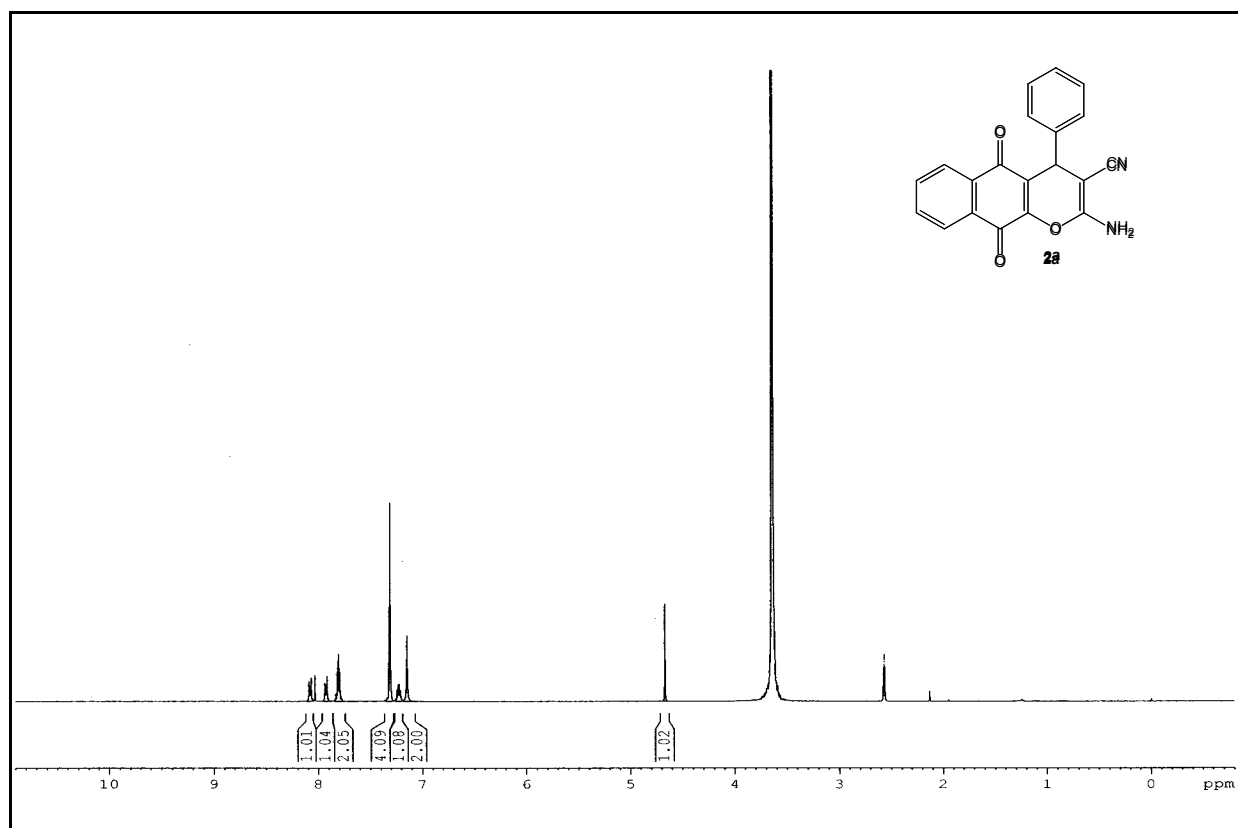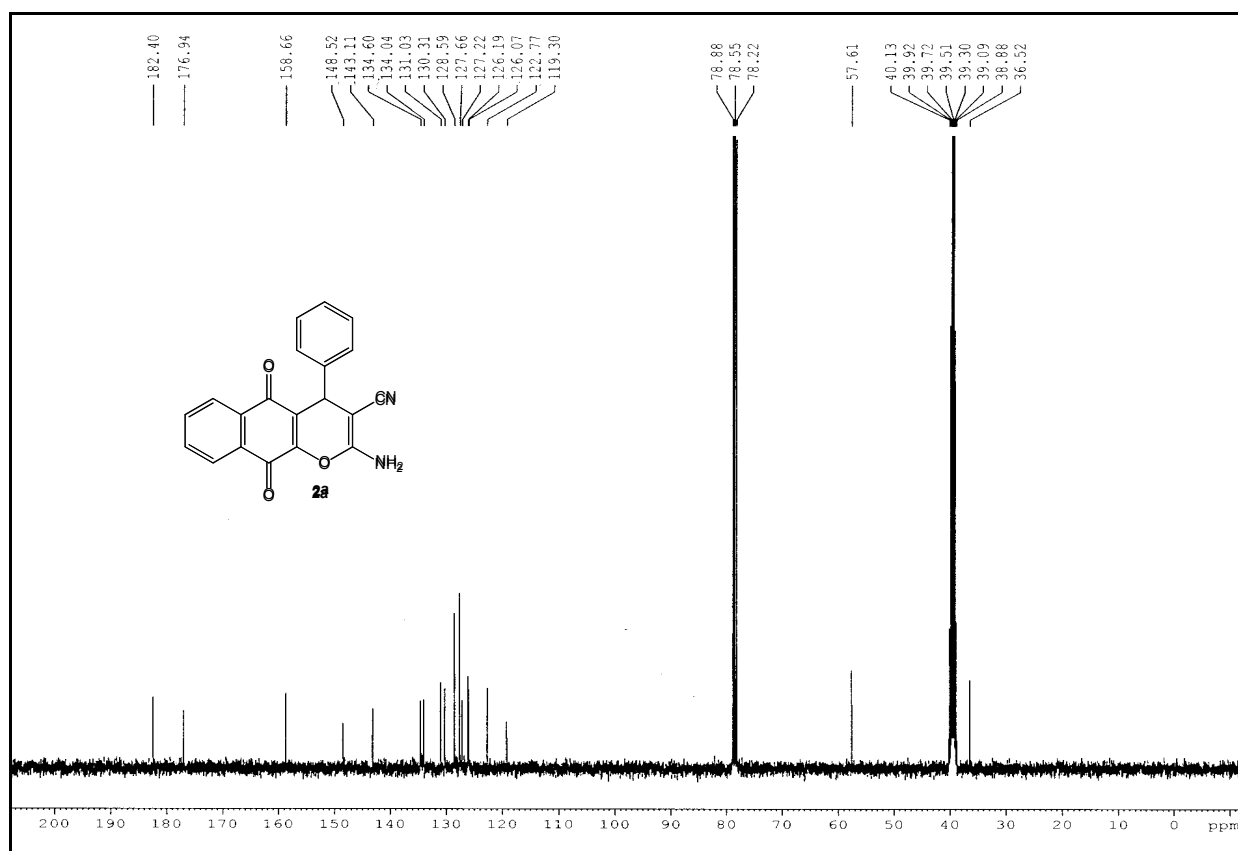

$^1\text{H}$  and  $^{13}\text{C}$  NMR spectra for **2b**

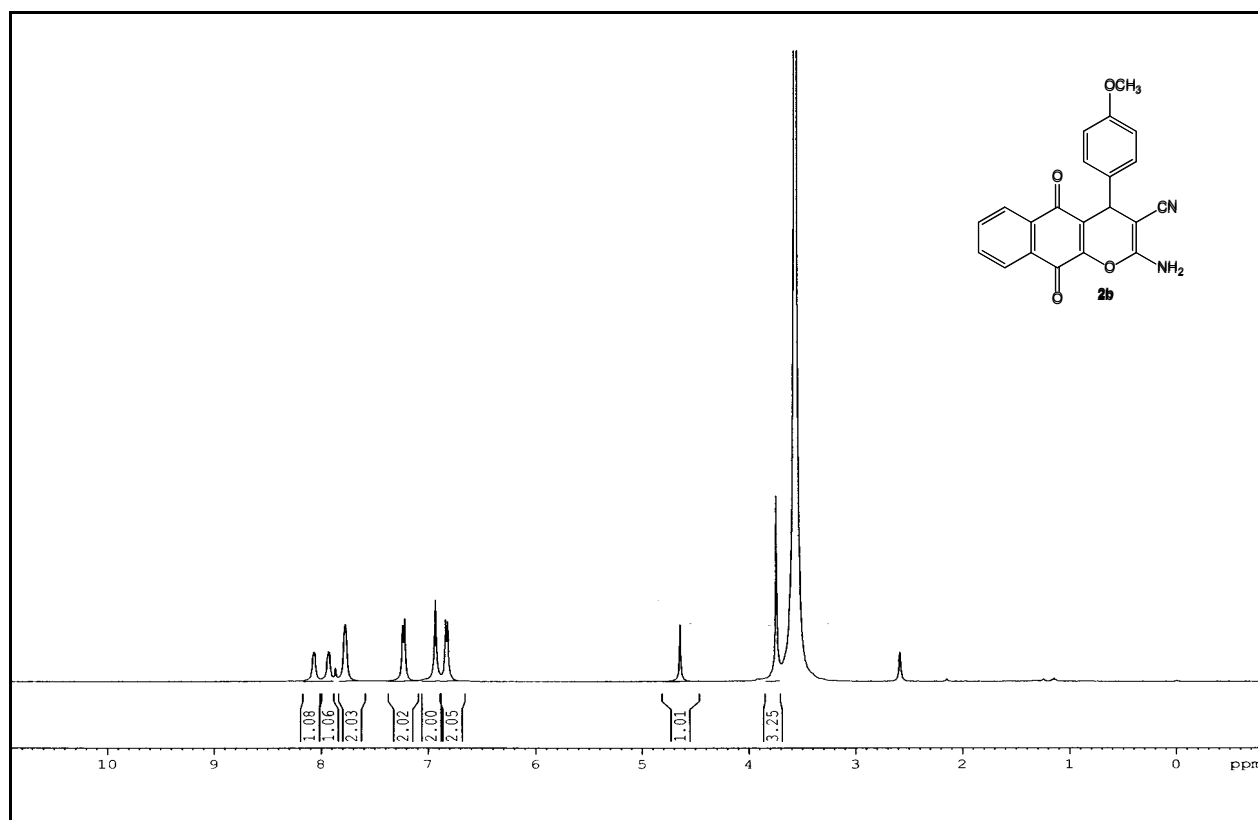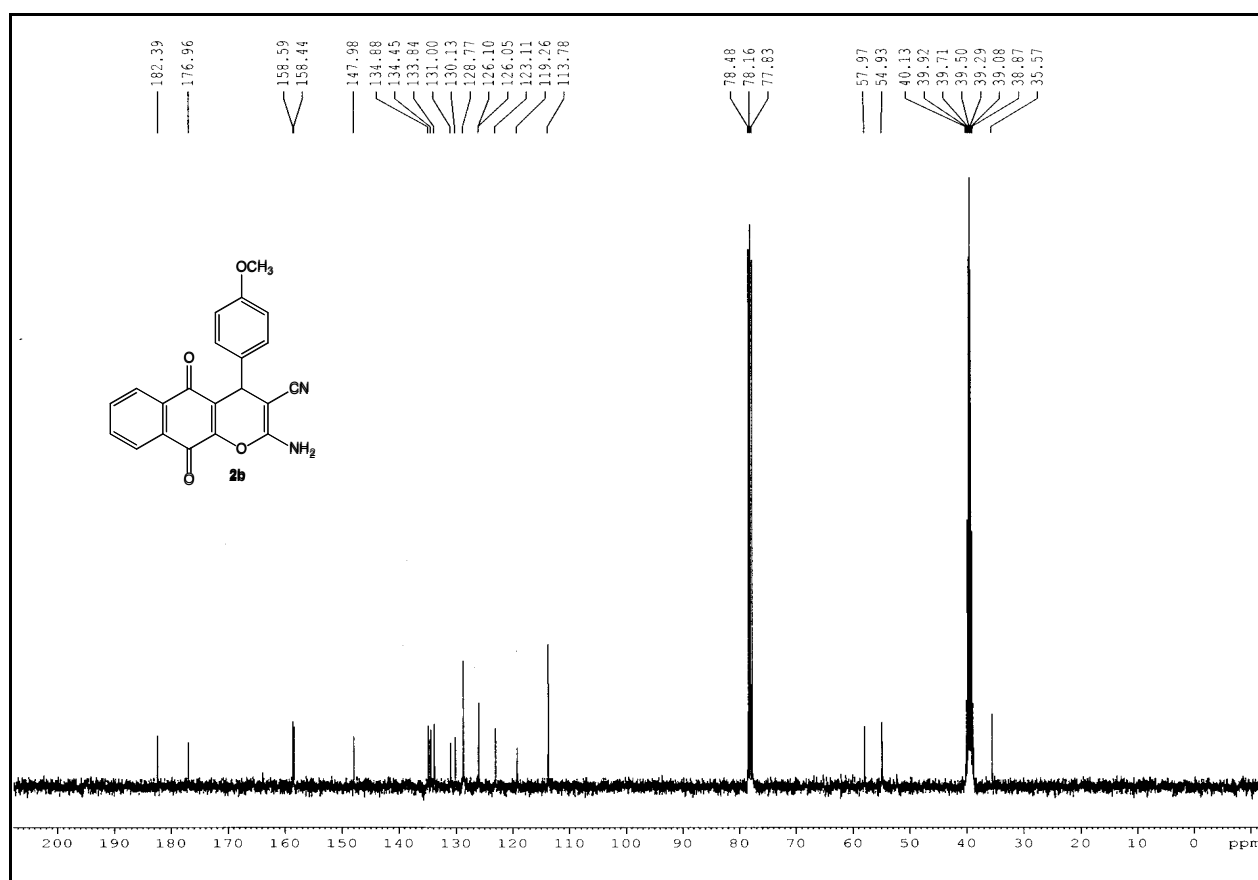

$^1\text{H}$  and  $^{13}\text{C}$  NMR spectra for **2c**

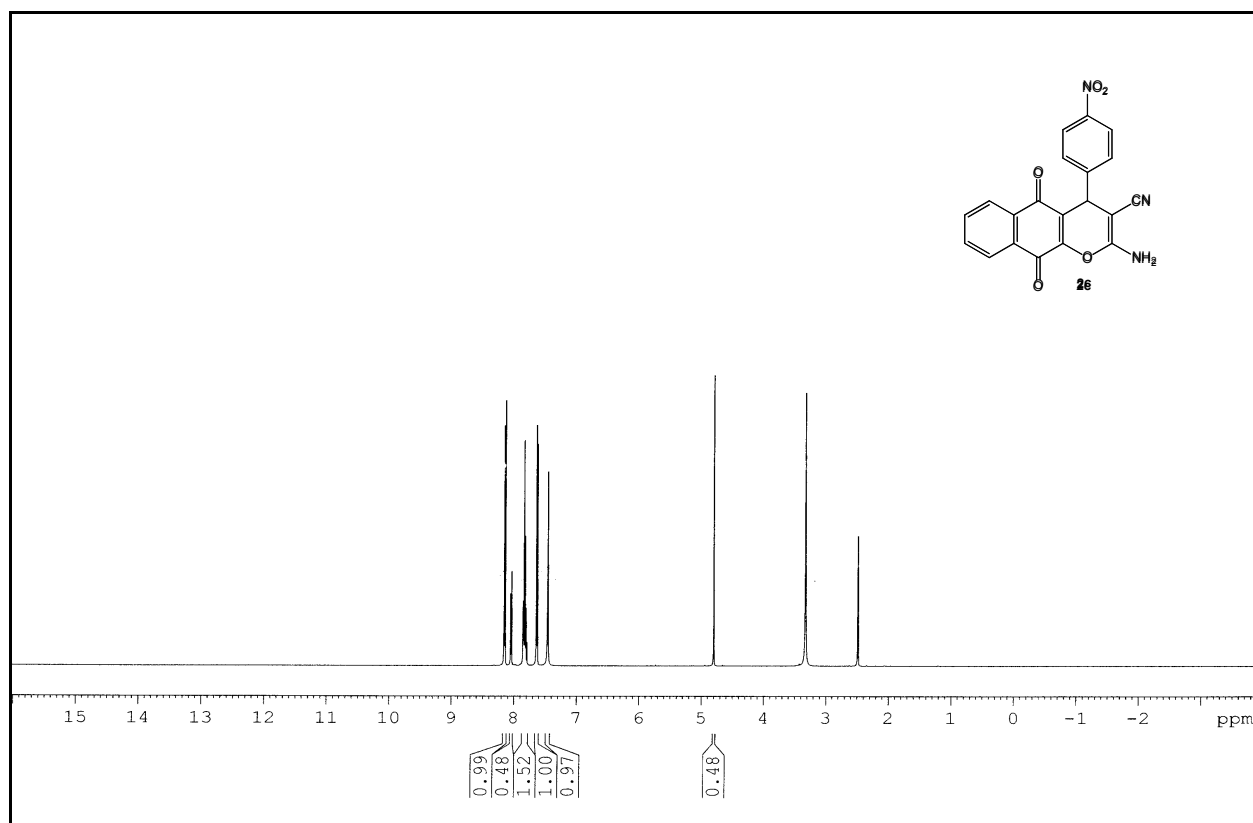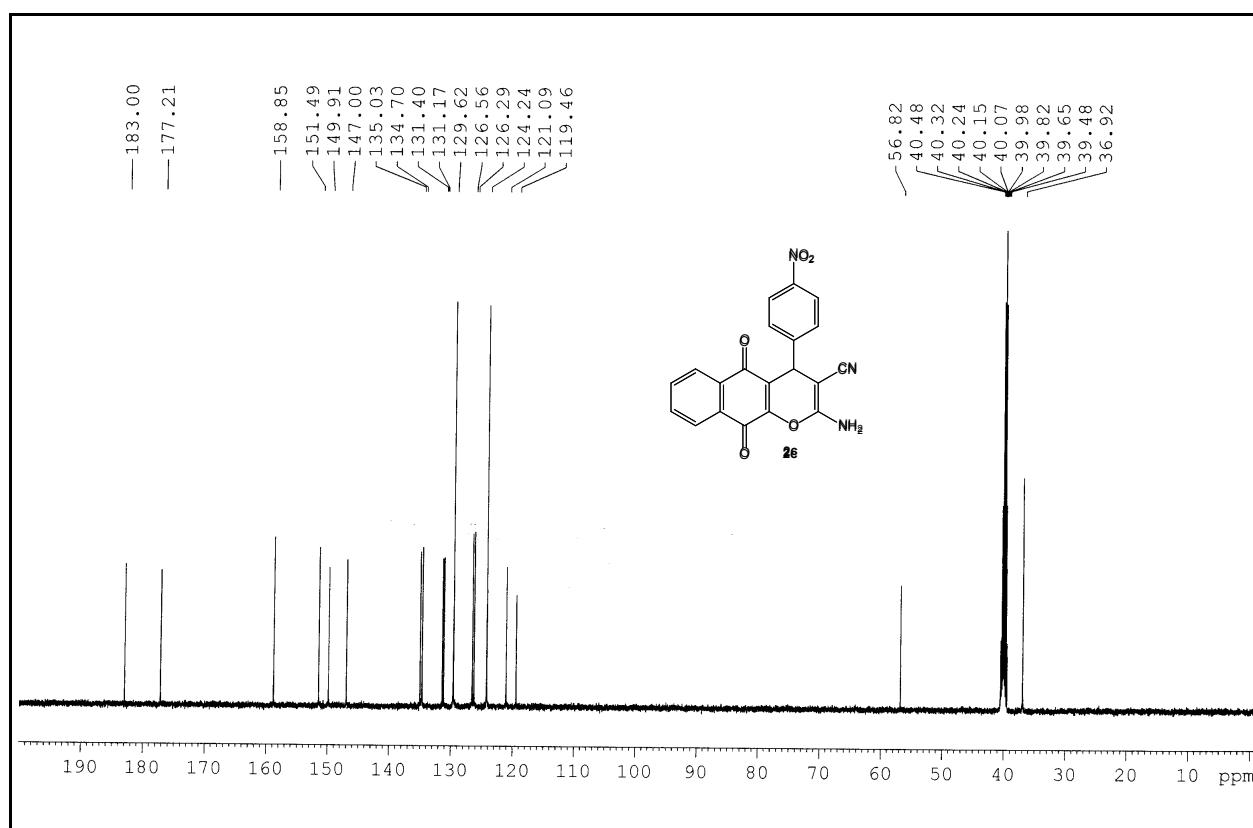

$^1\text{H}$  and  $^{13}\text{C}$  NMR spectra for **2d**

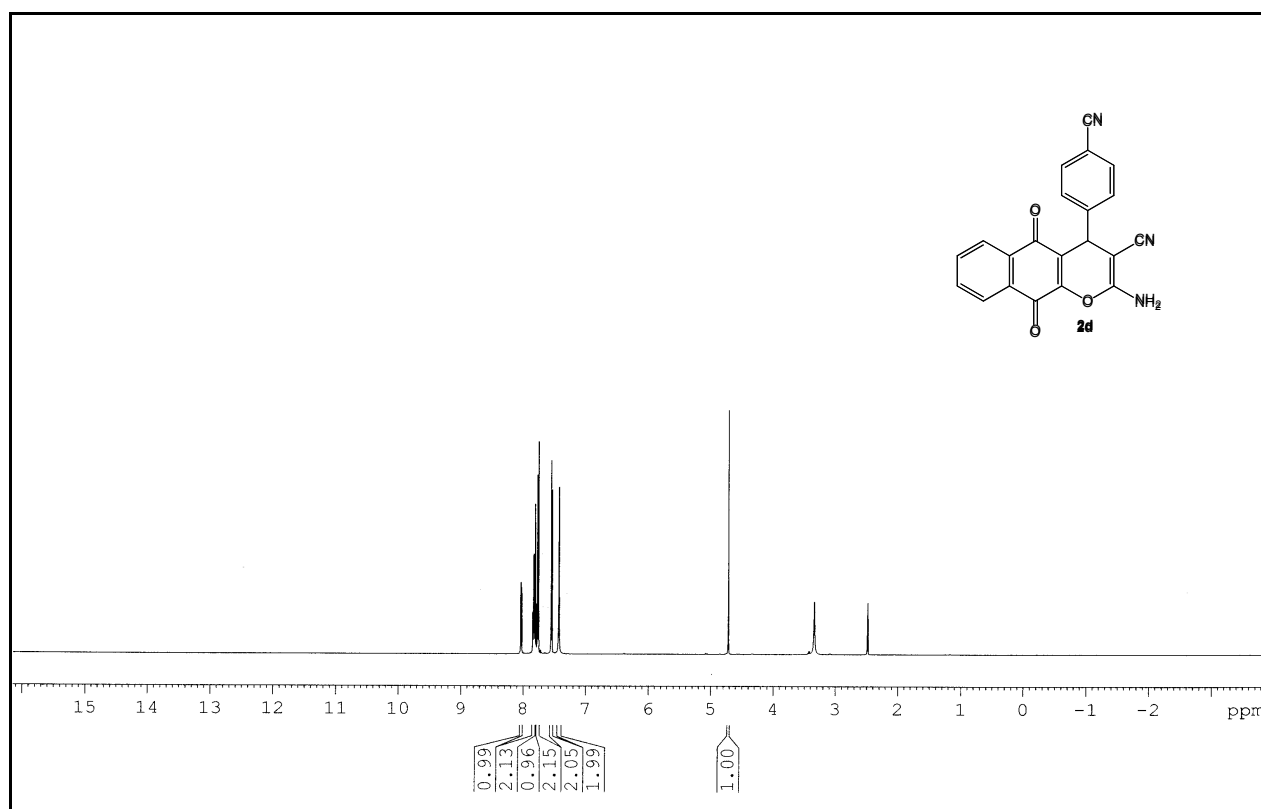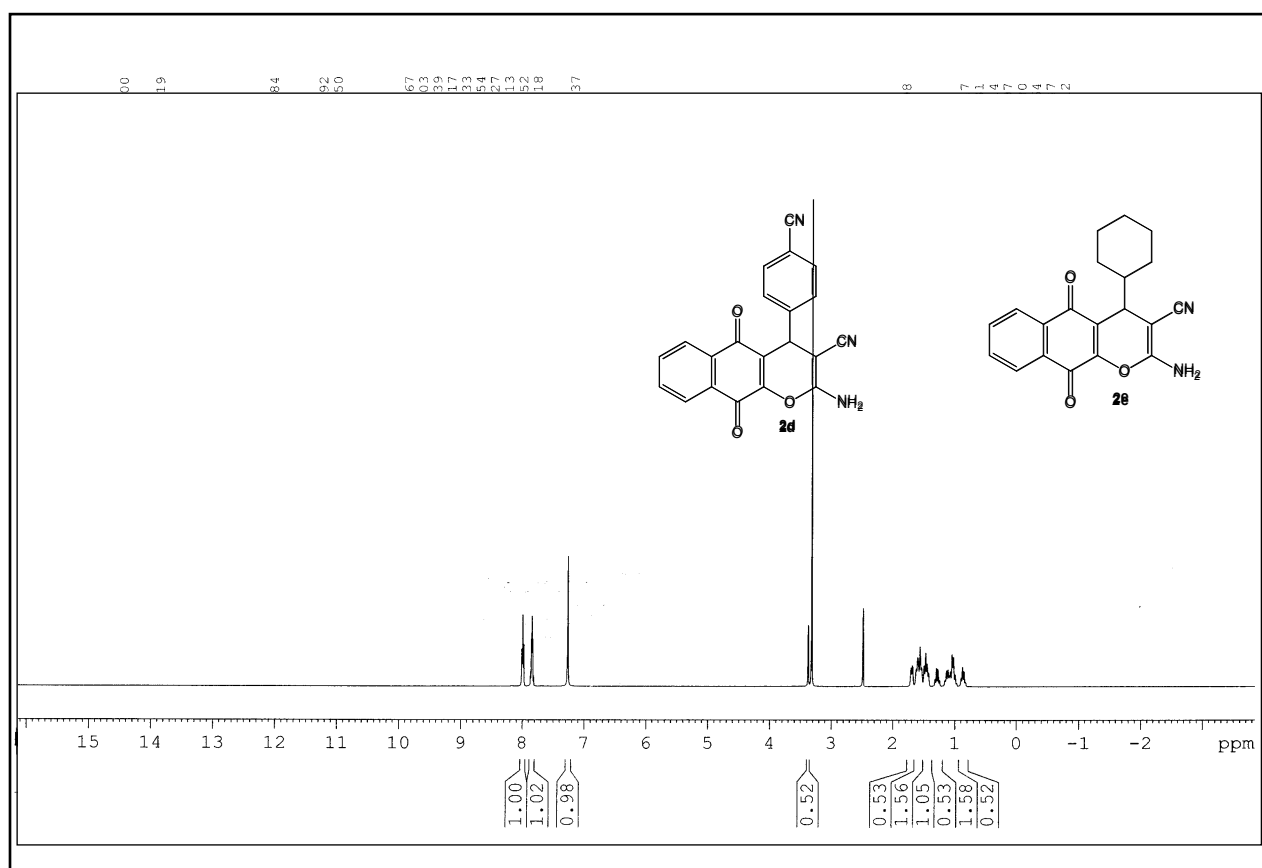

$^1\text{H}$  and  $^{13}\text{C}$  NMR spectra for **2e**

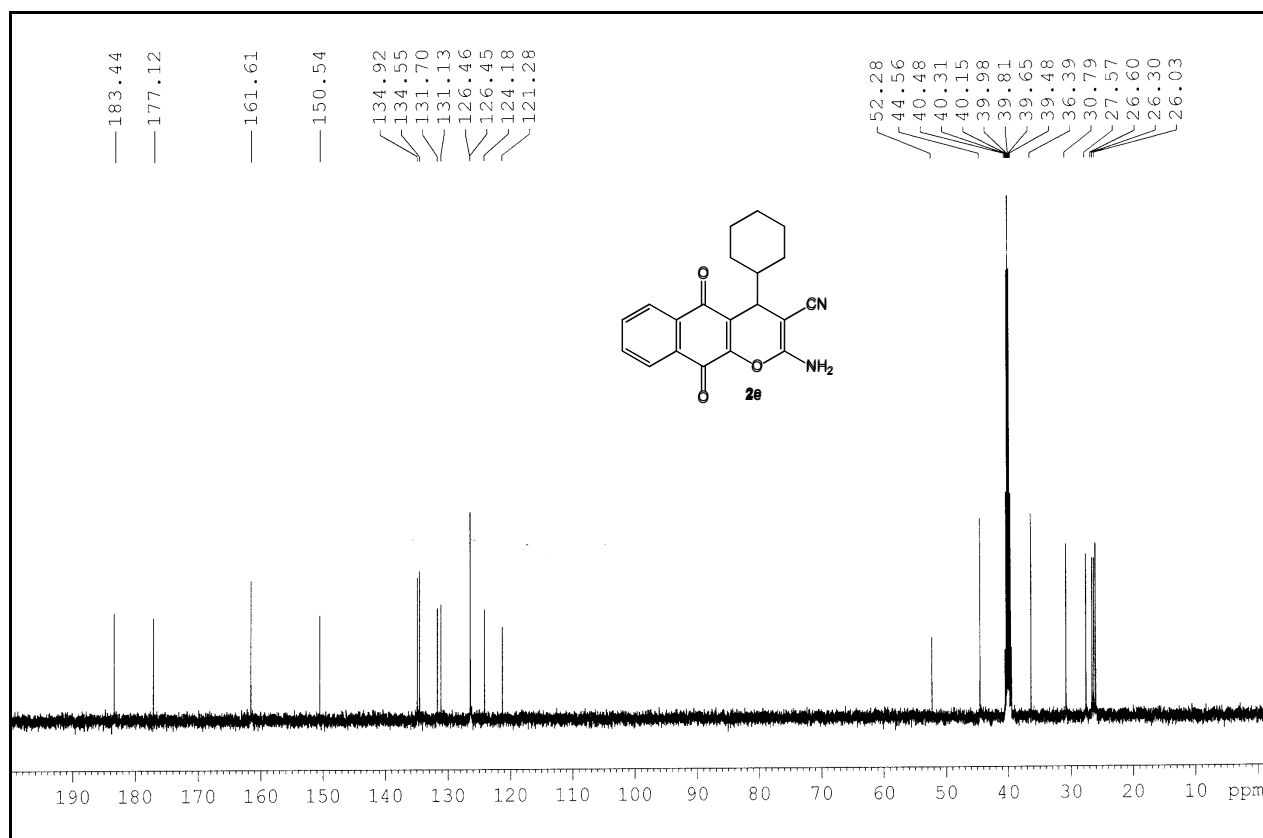

<sup>1</sup>H and <sup>13</sup>C NMR spectra for **3a**

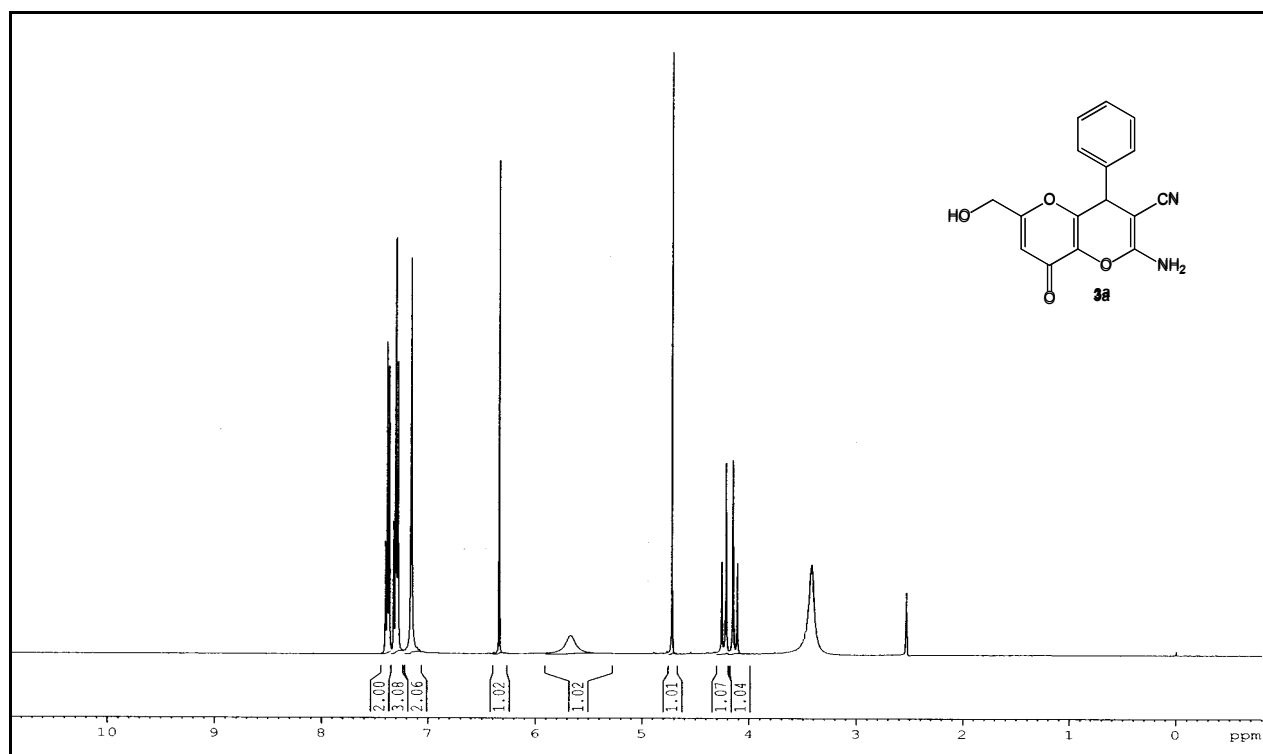

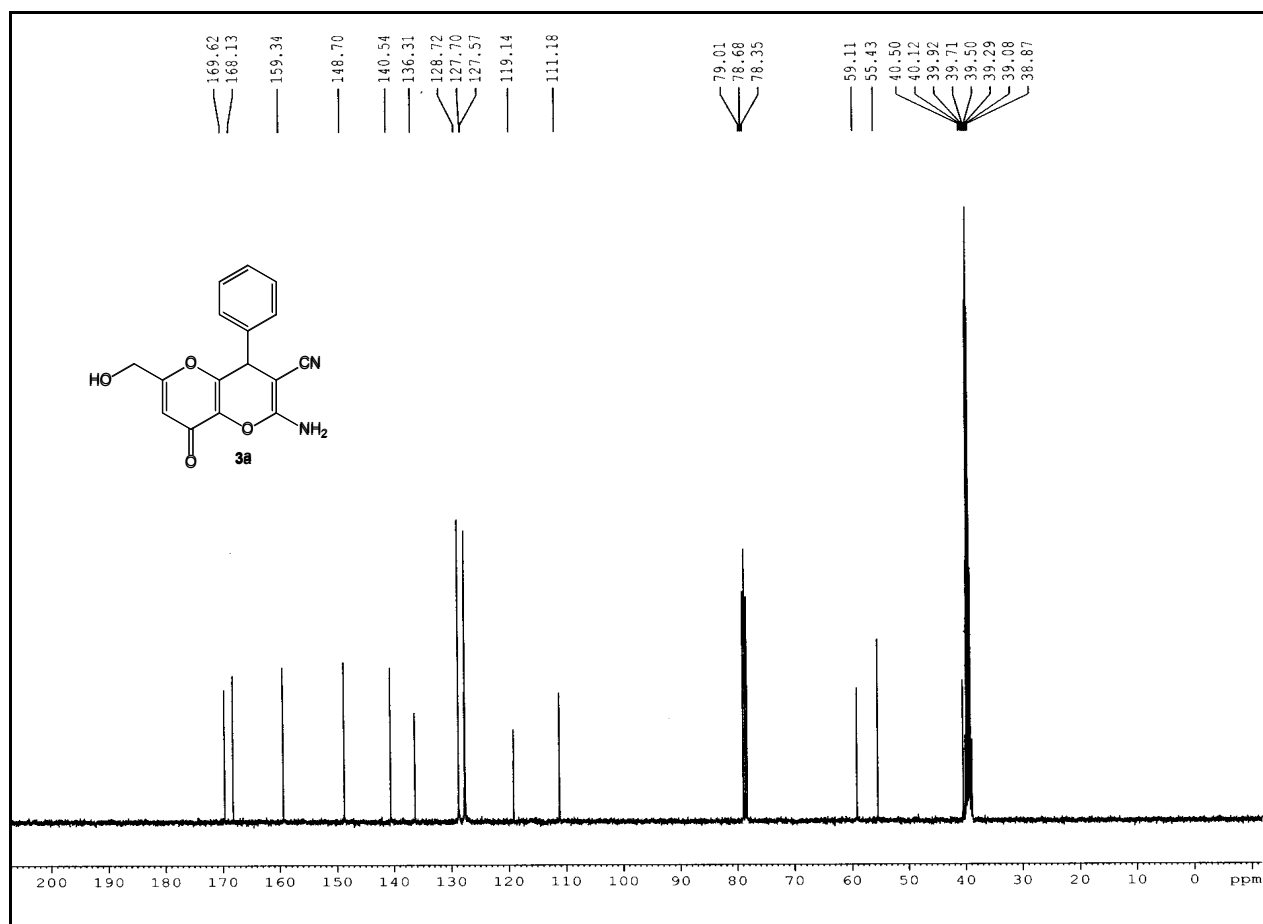

$^1\text{H}$  and  $^{13}\text{C}$  NMR spectra for **3b**

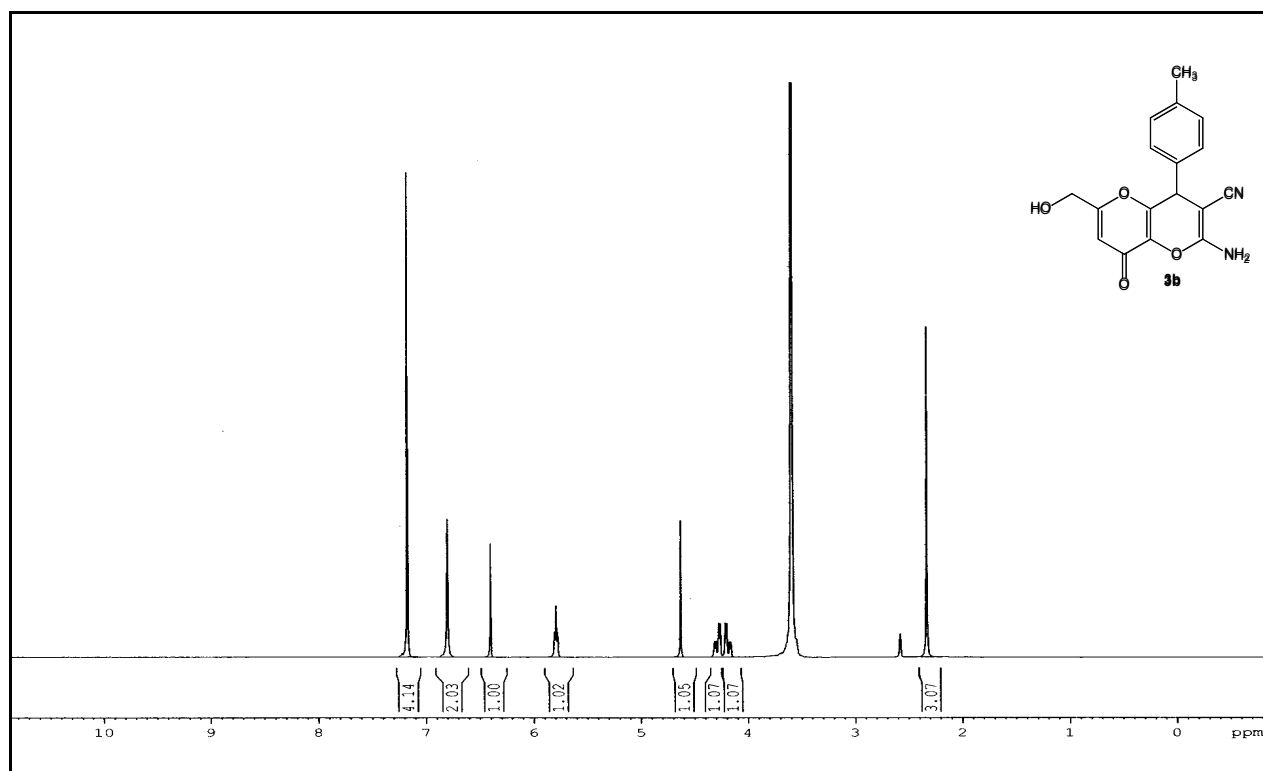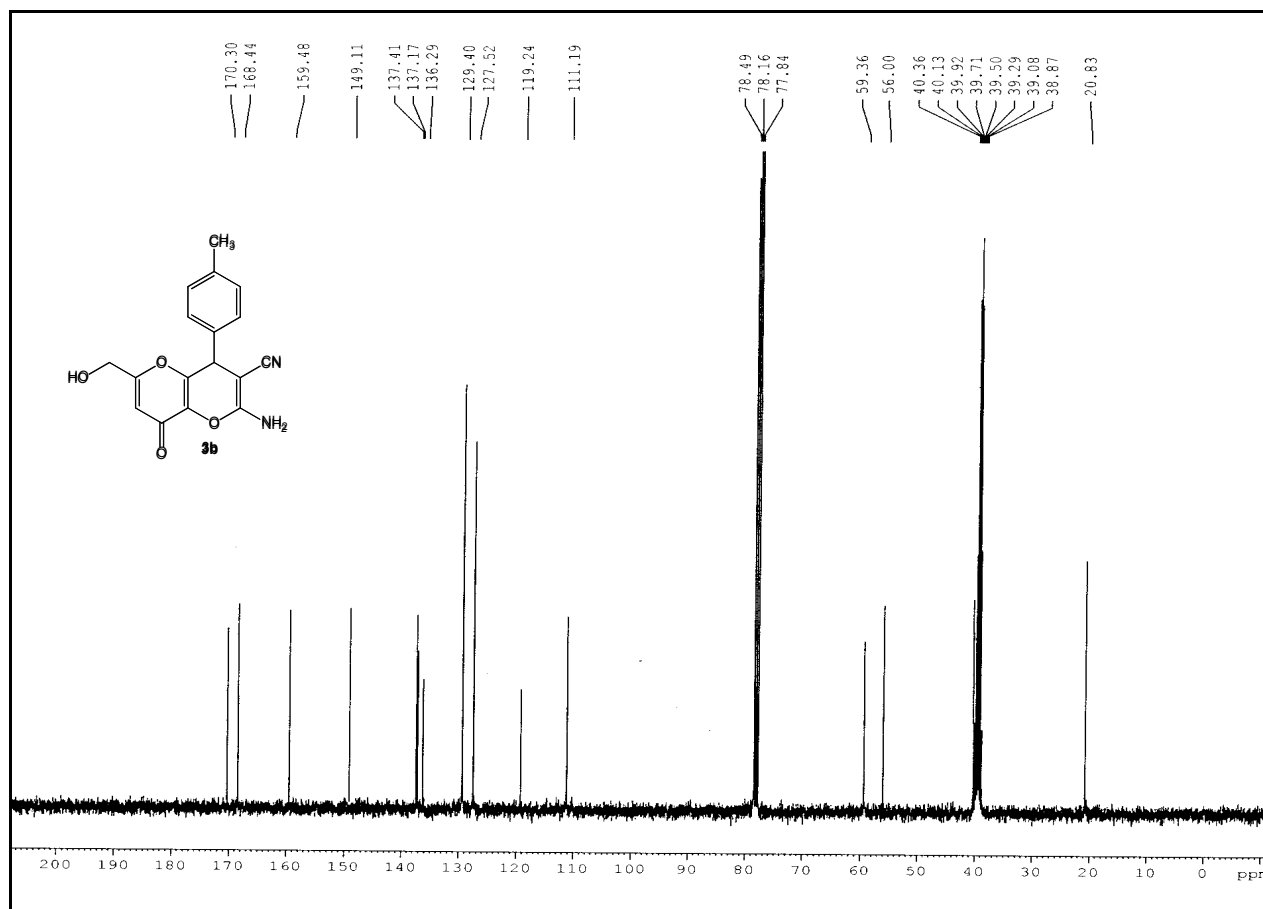

<sup>1</sup>H and <sup>13</sup>C NMR spectra for 3c

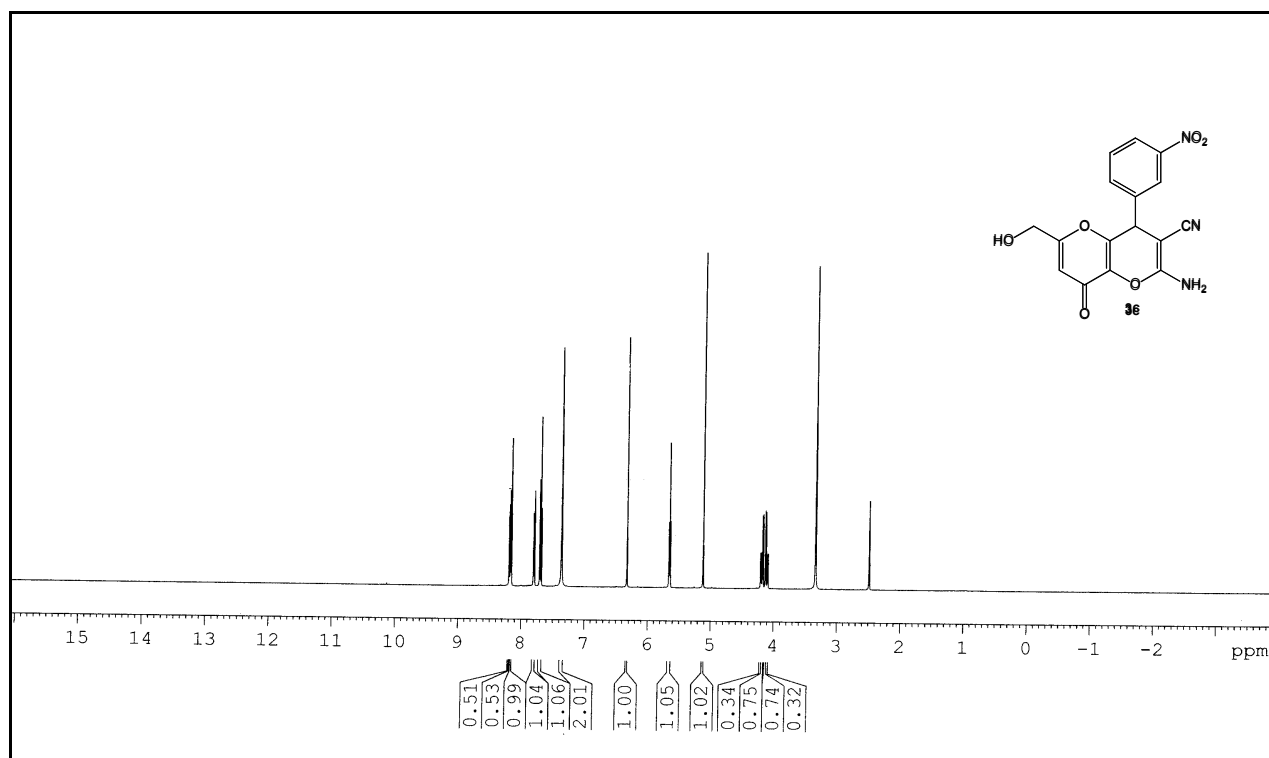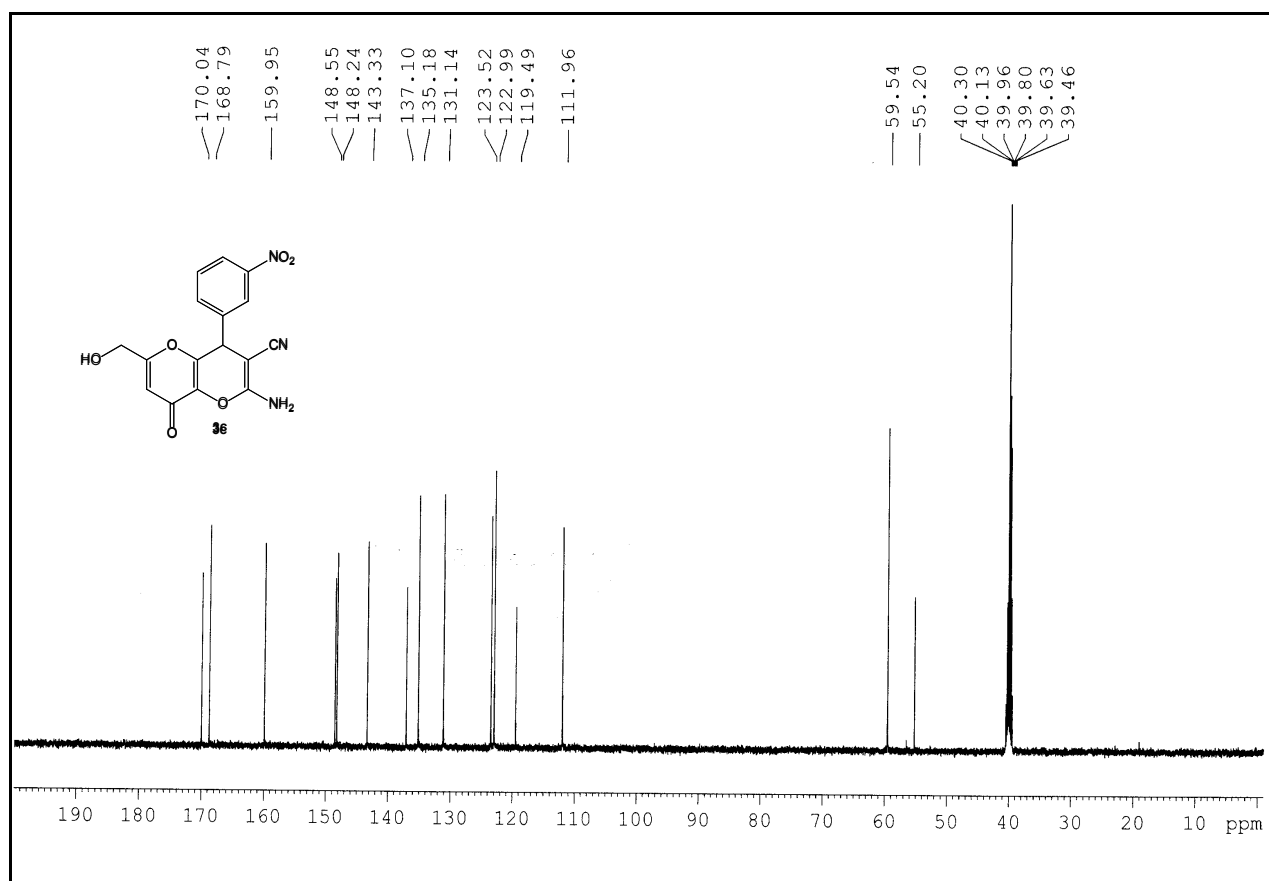

<sup>1</sup>H and <sup>13</sup>C NMR spectra for **3d**



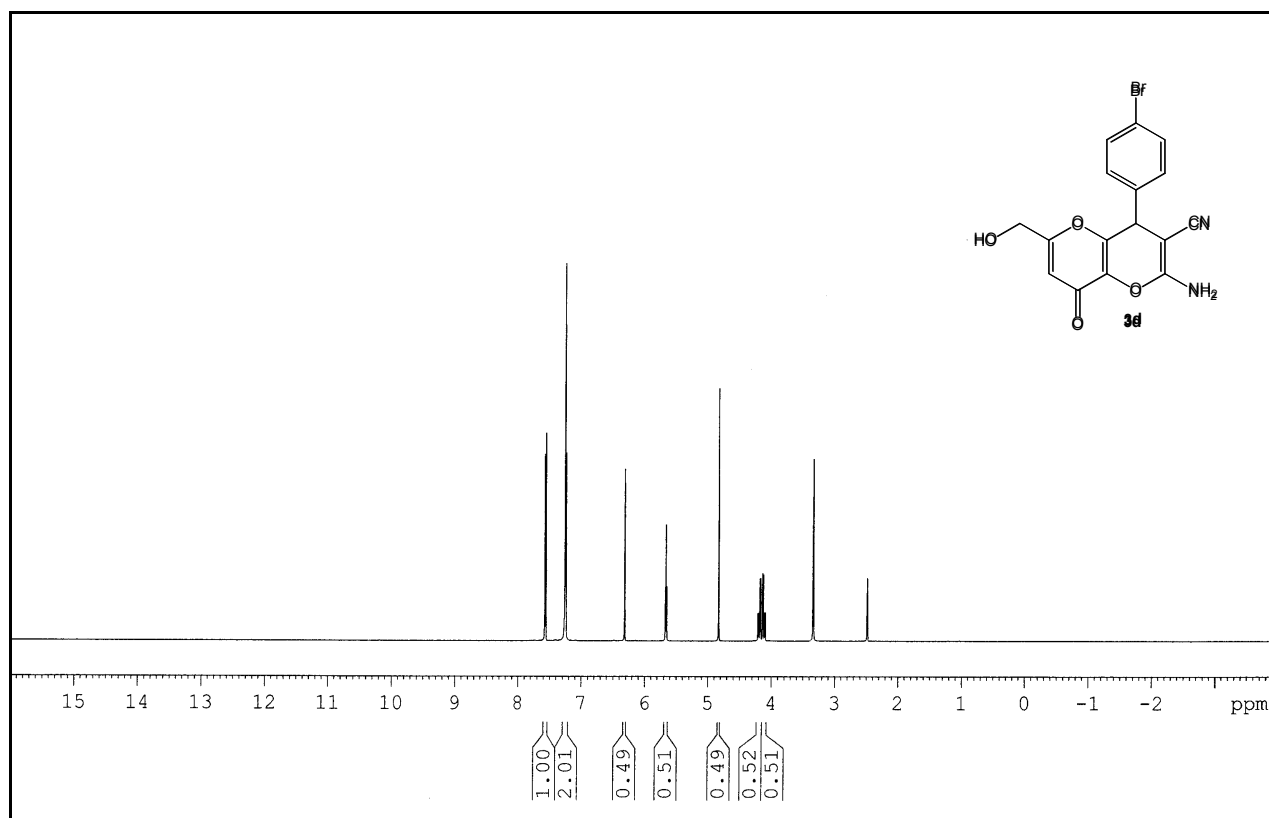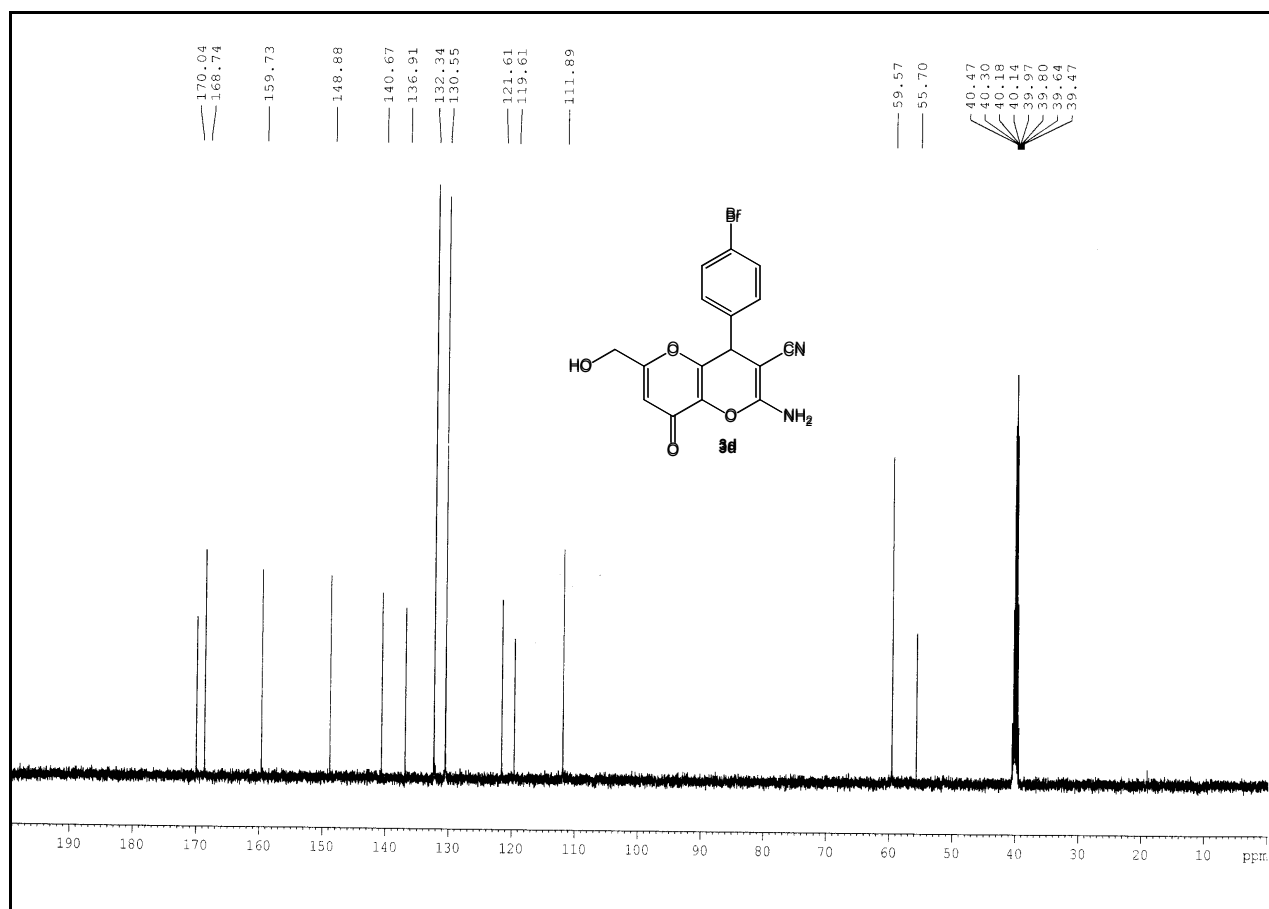

<sup>1</sup>H and <sup>13</sup>C NMR spectra for 3e

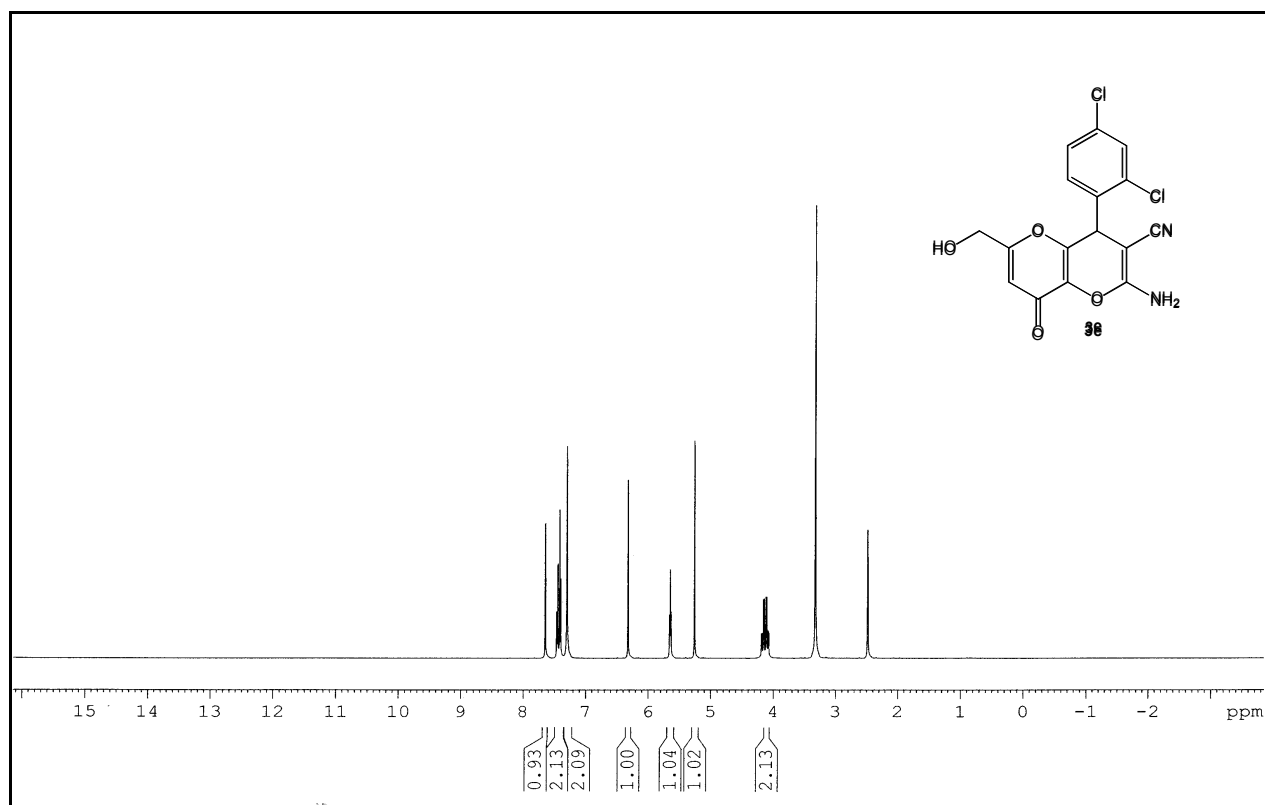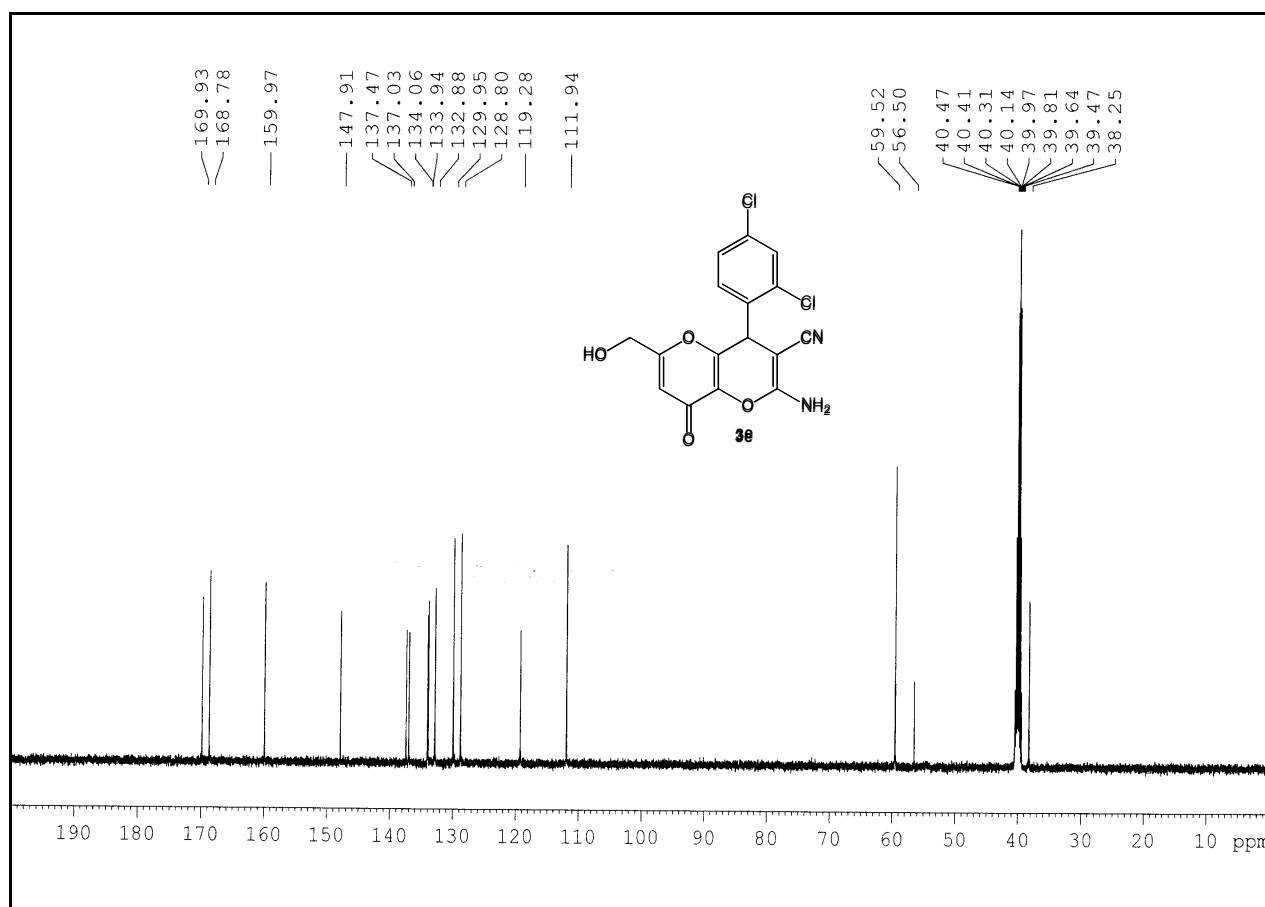

<sup>1</sup>H and <sup>13</sup>C NMR spectra for **4a**

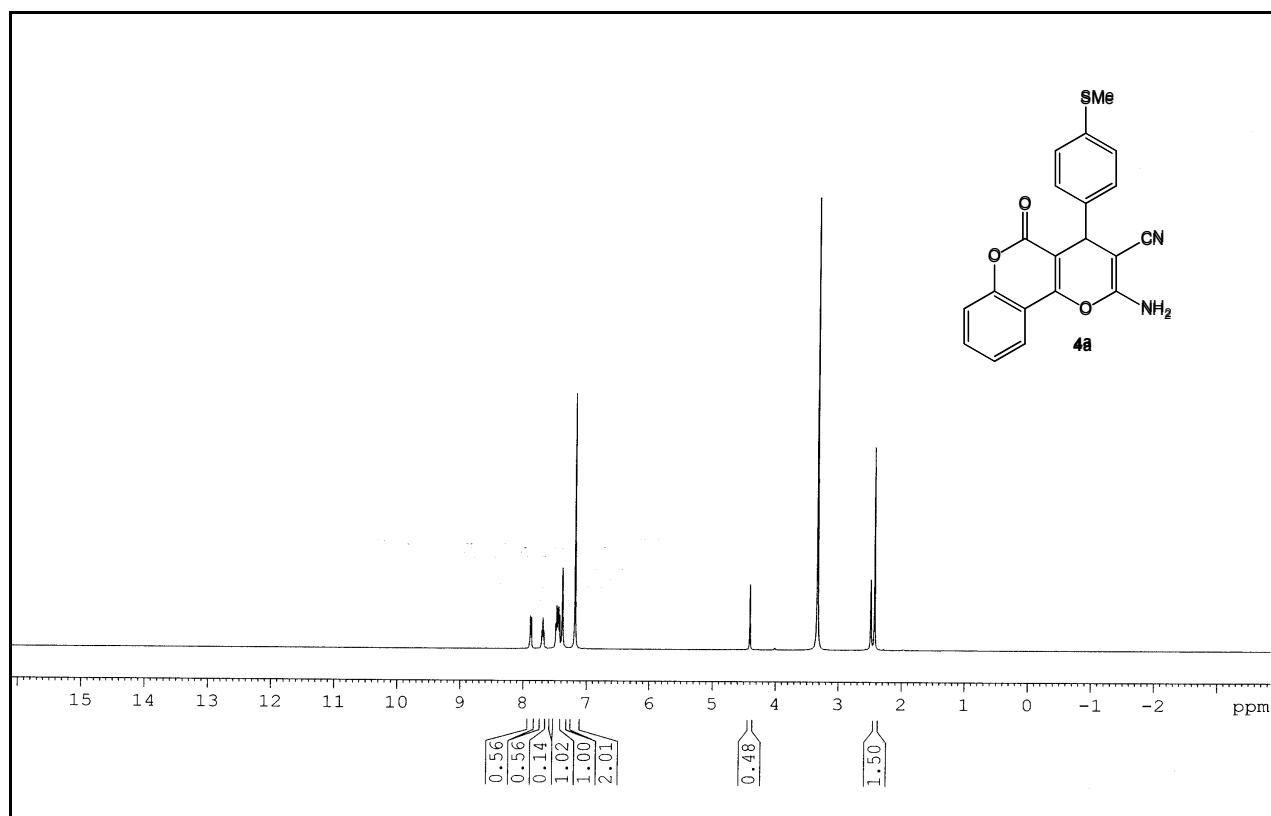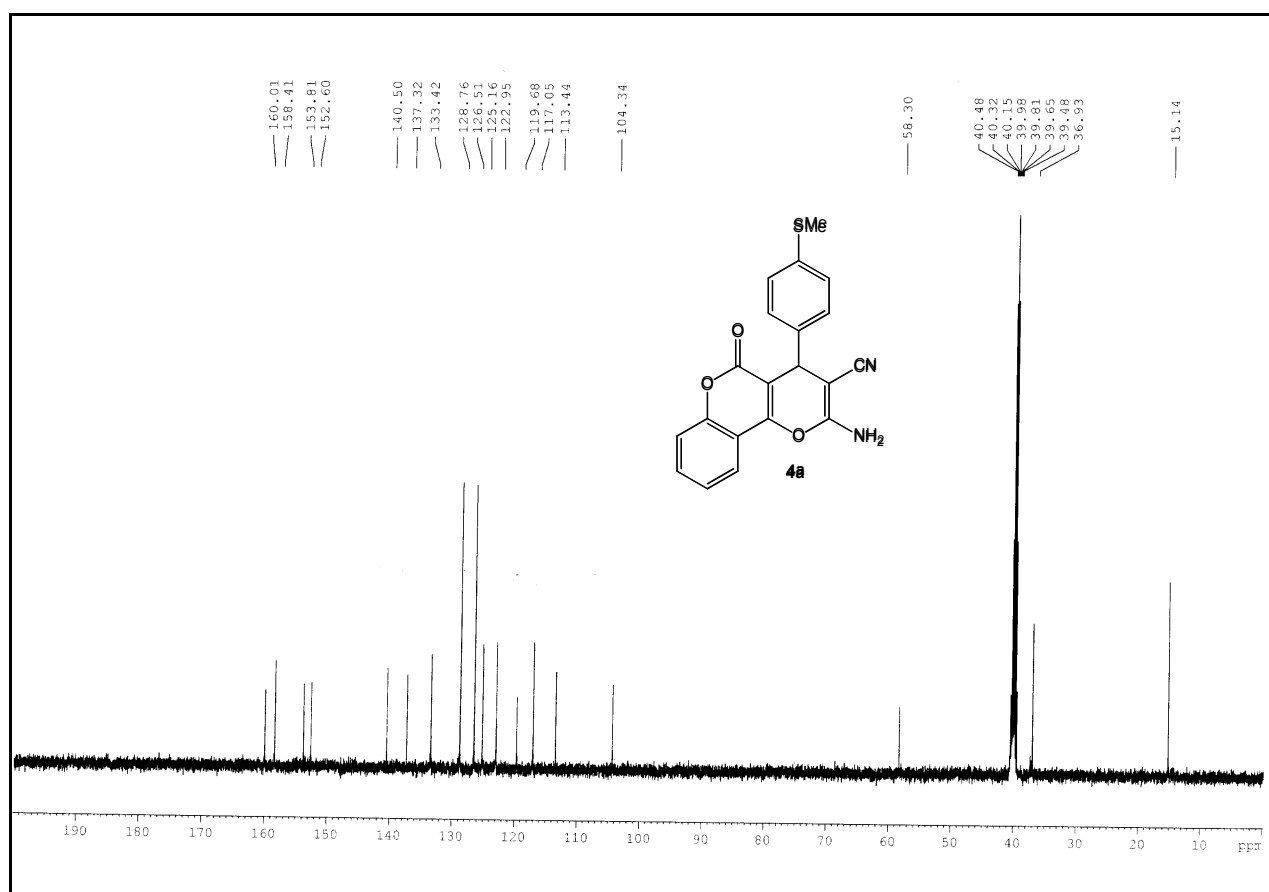

<sup>1</sup>H and <sup>13</sup>C NMR spectra for **4b**

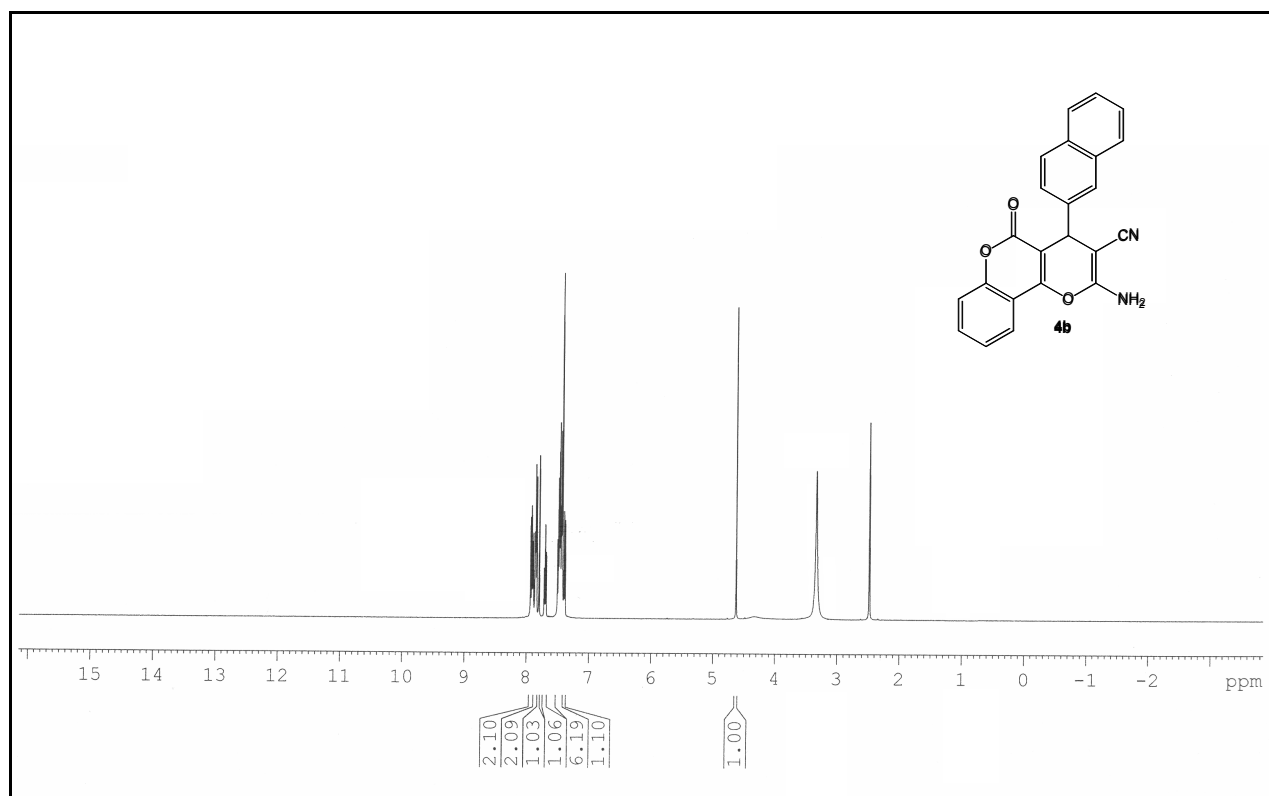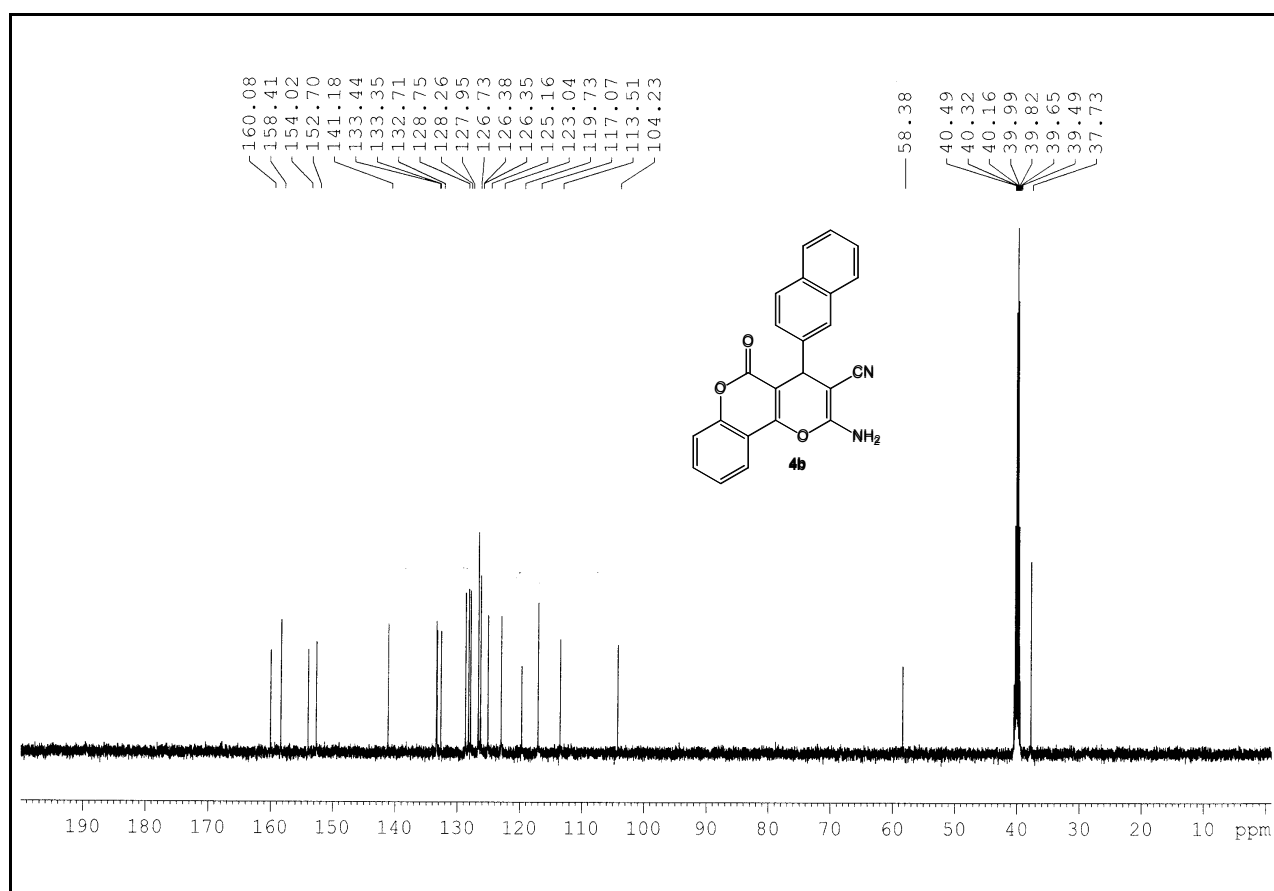

<sup>1</sup>H and <sup>13</sup>C NMR spectra for **4c**

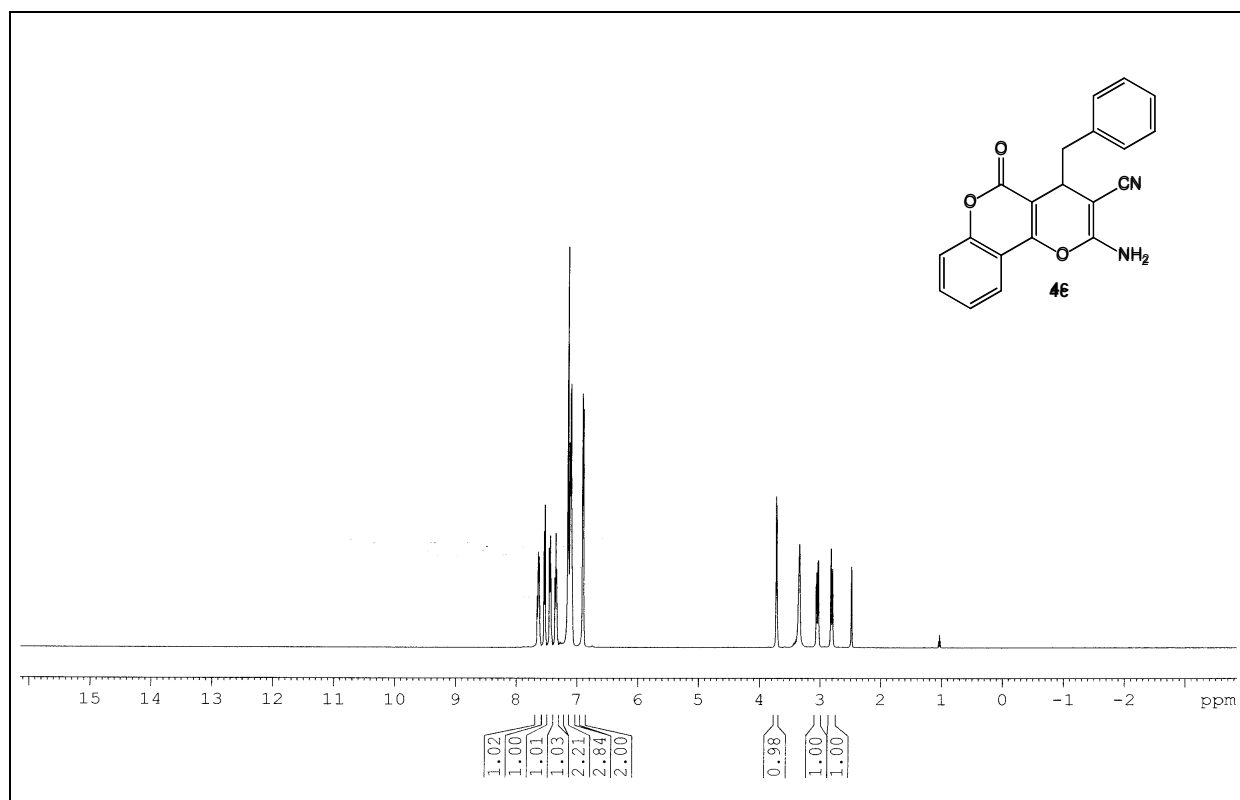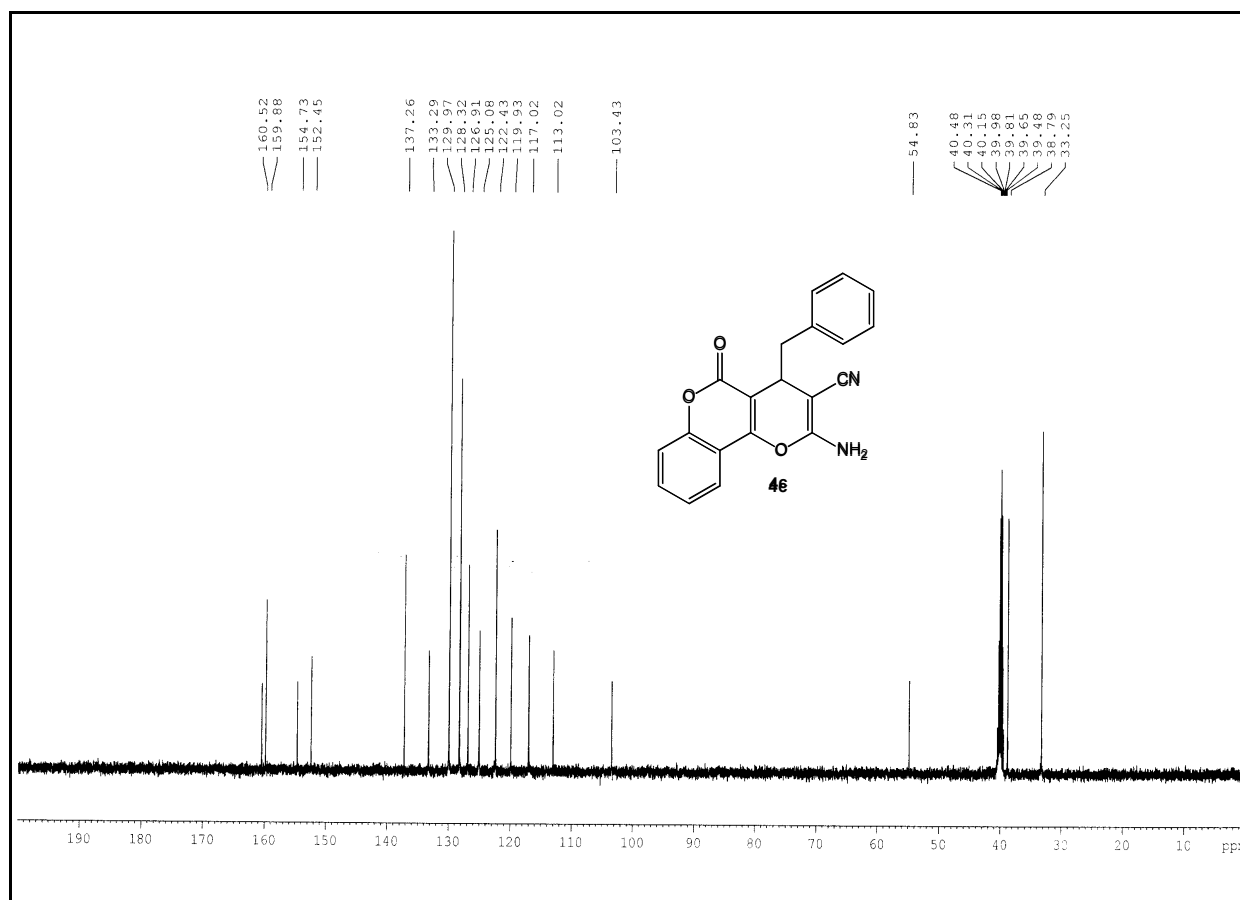

<sup>1</sup>H and <sup>13</sup>C NMR spectra for **4d**

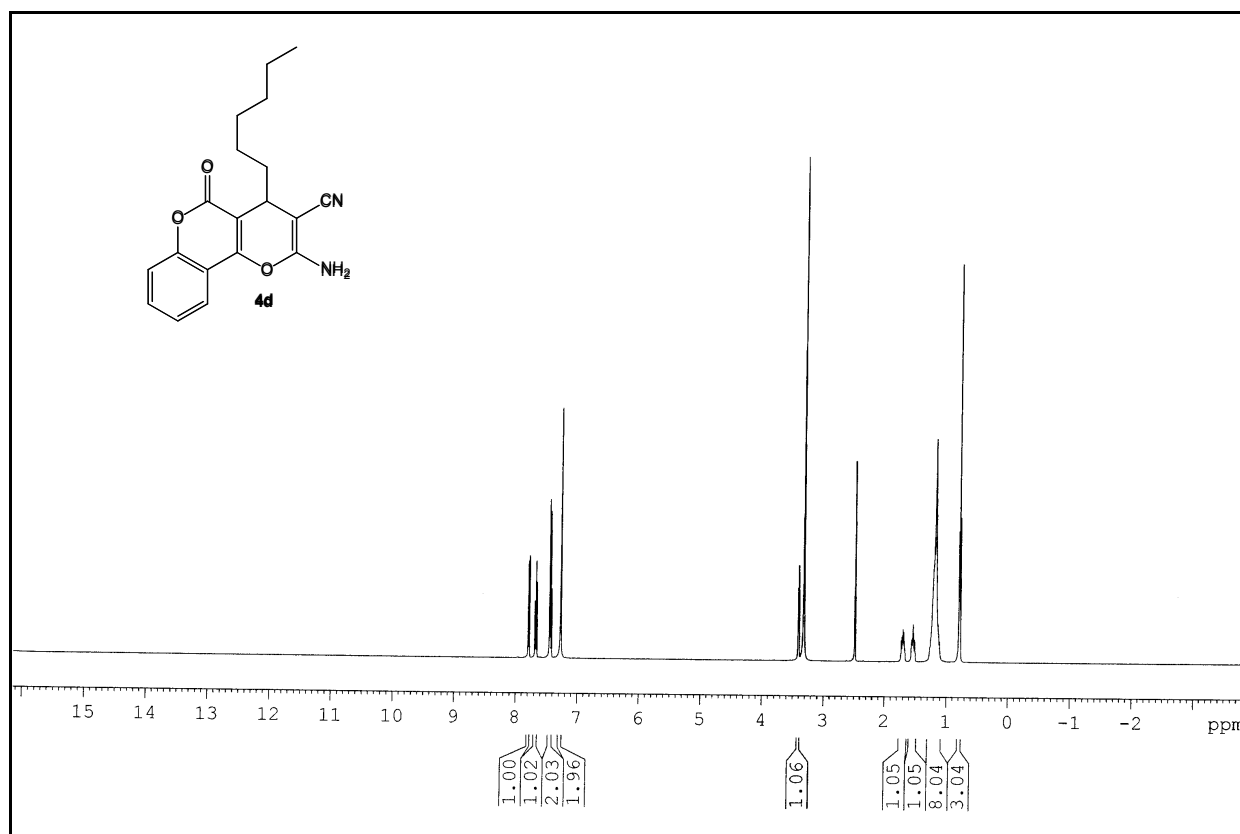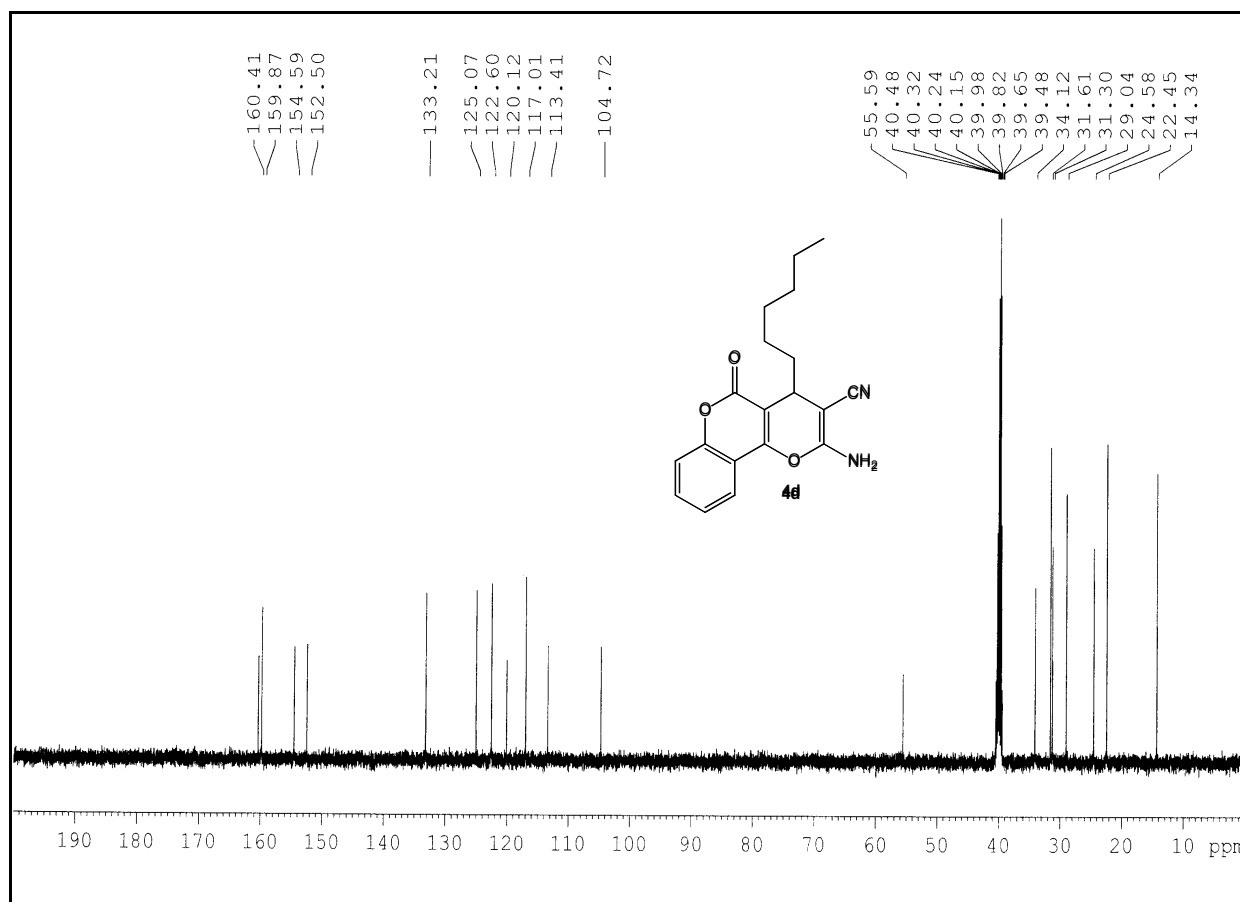

$^1\text{H}$  and  $^{13}\text{C}$  NMR spectra for **5a**

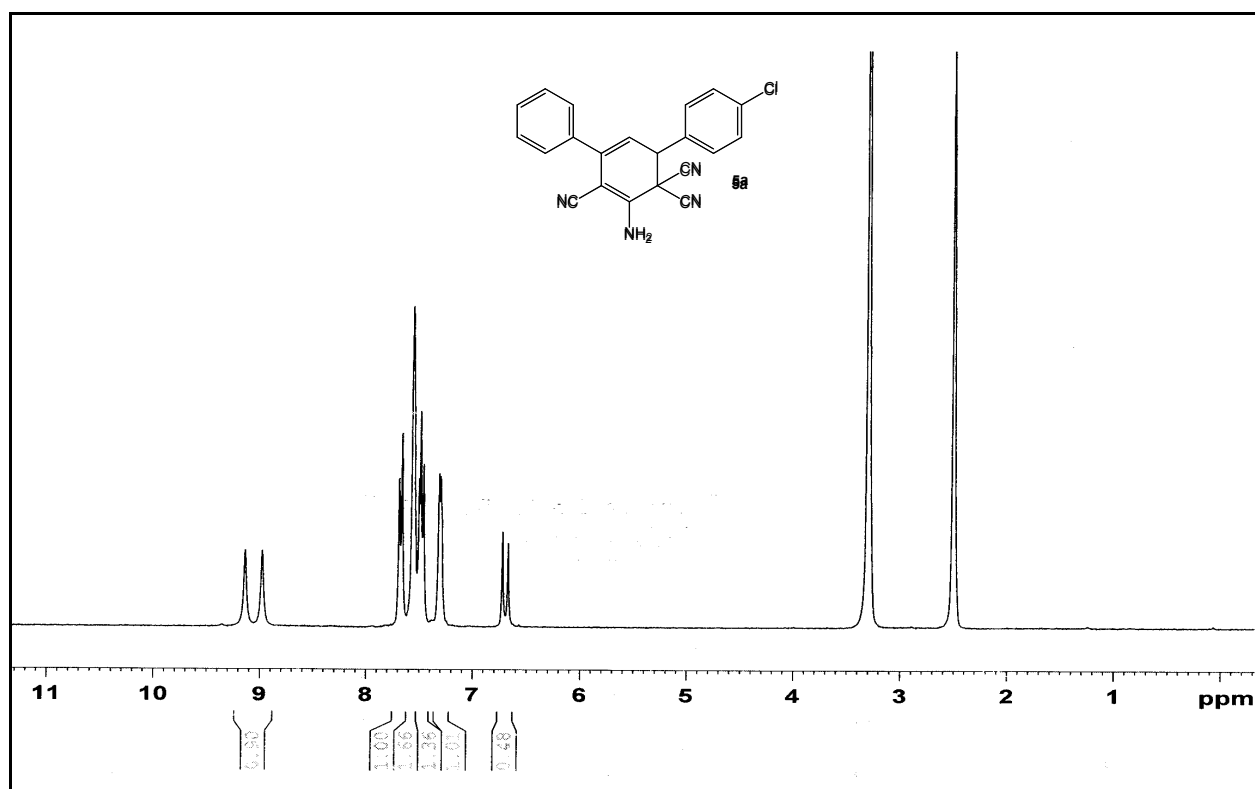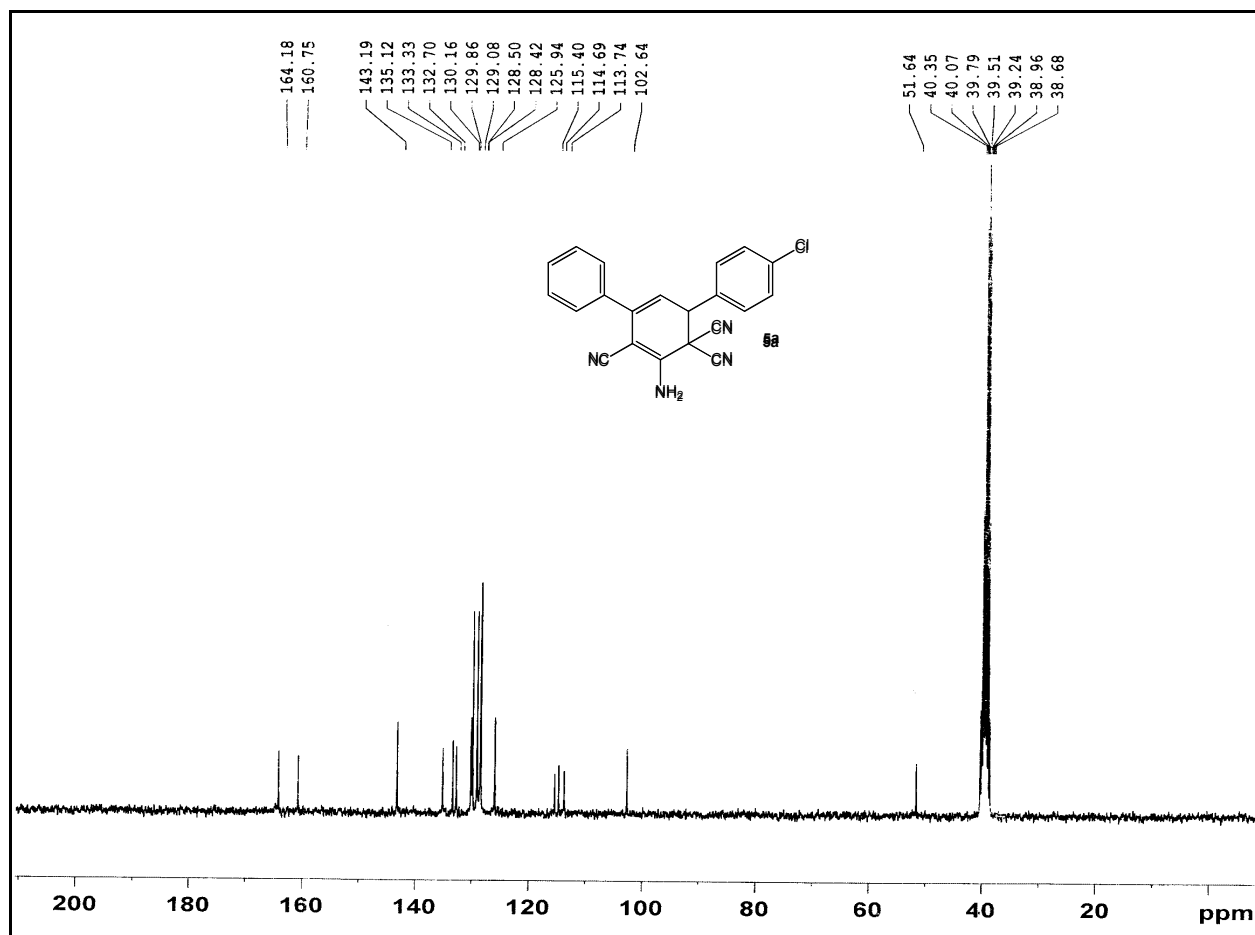

$^1\text{H}$  and  $^{13}\text{C}$  NMR spectra for **5b**

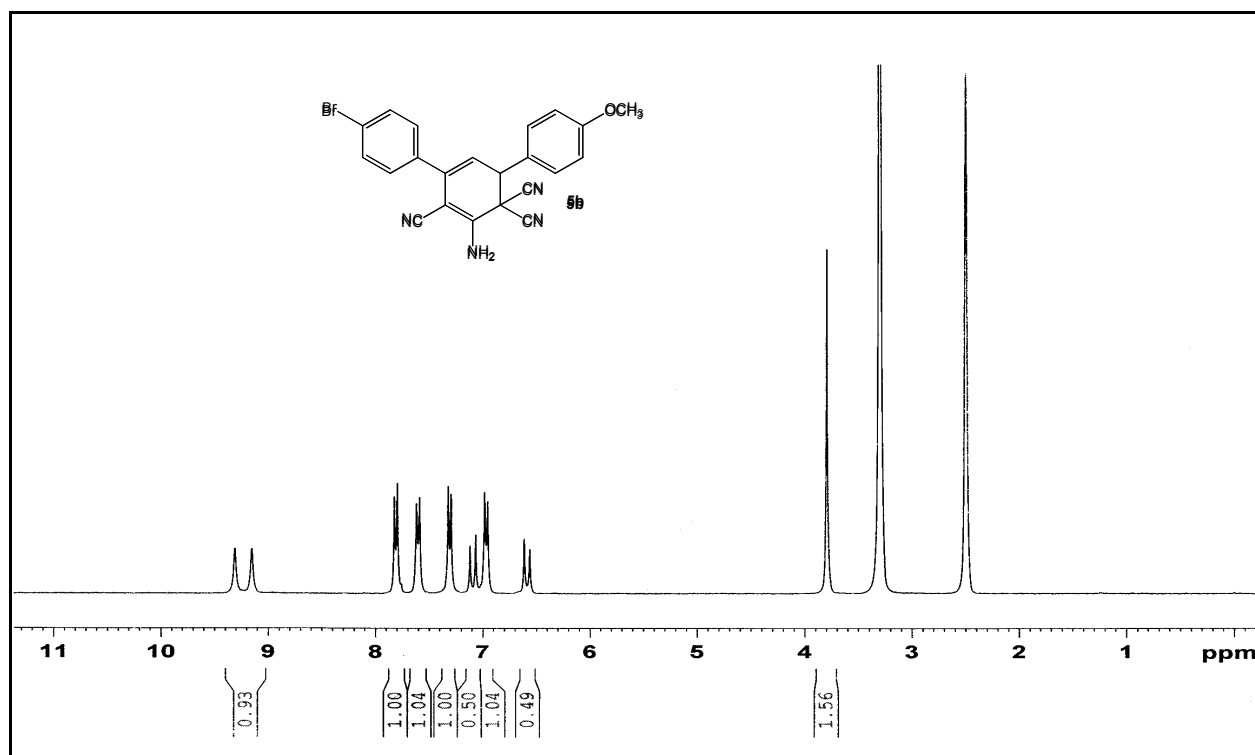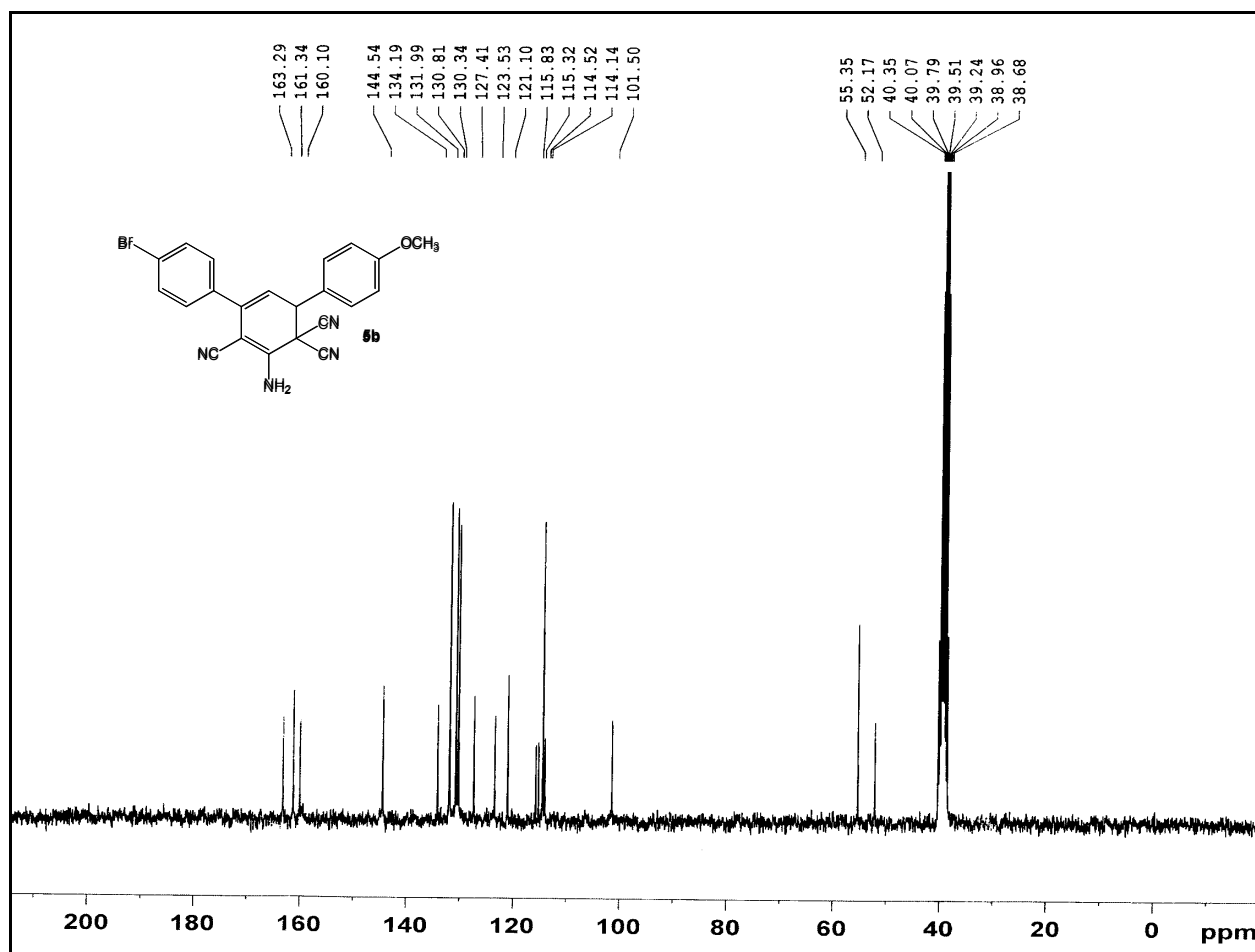



$^1\text{H}$  and  $^{13}\text{C}$  NMR spectra for **5c**

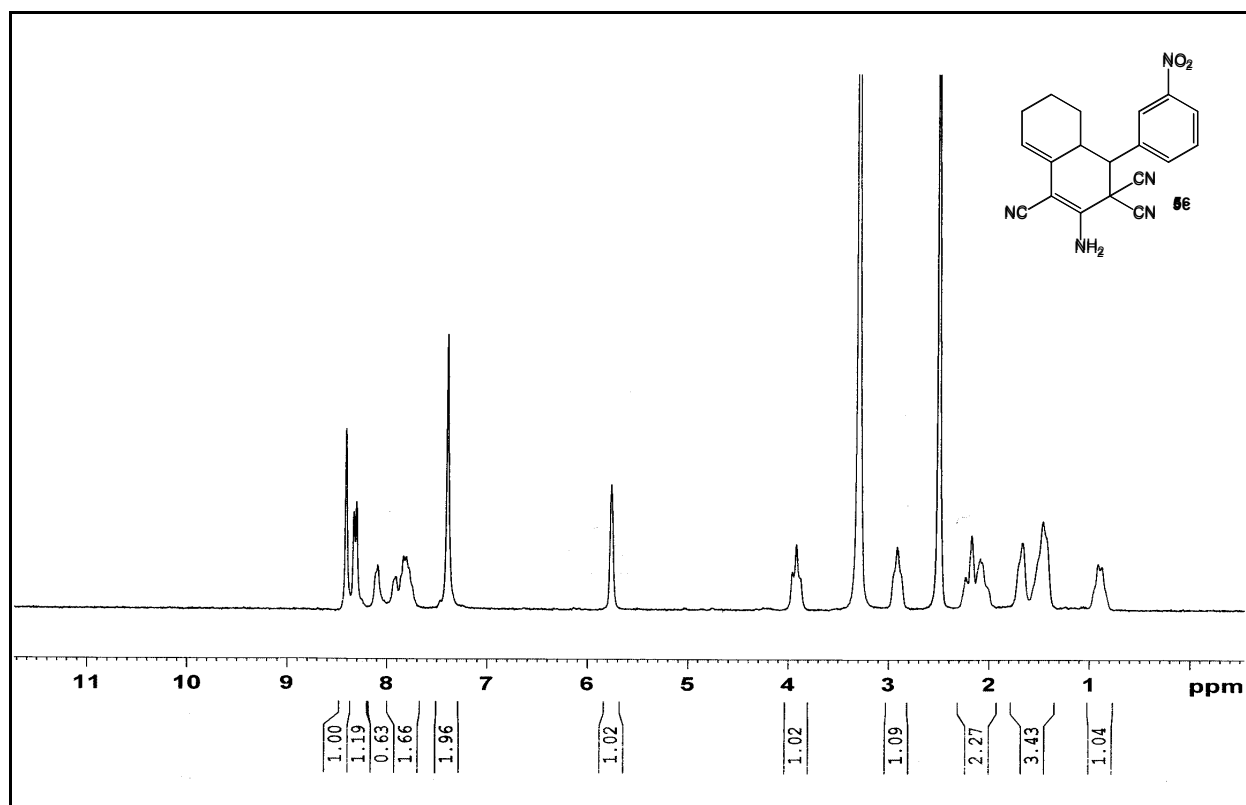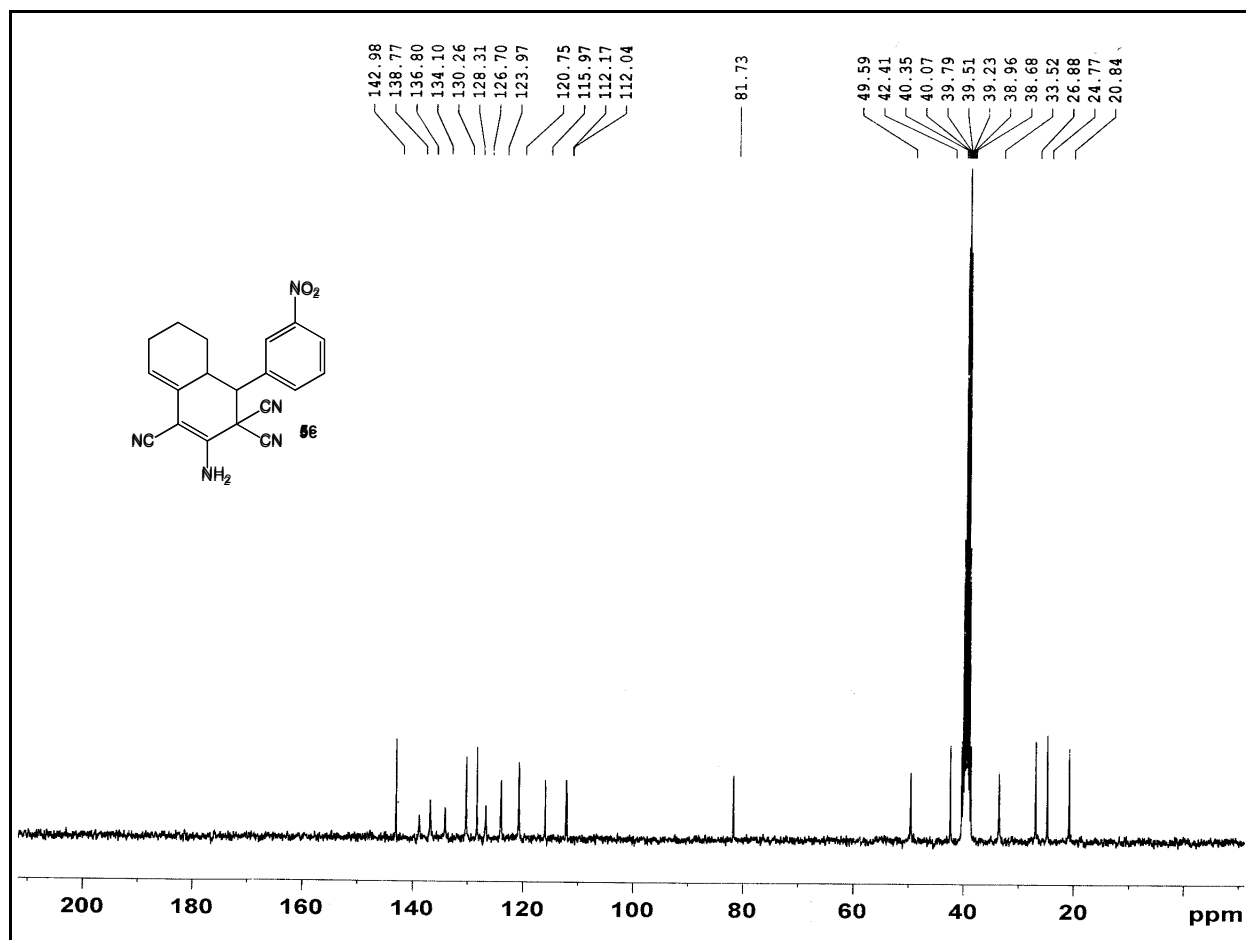

$^1\text{H}$  and  $^{13}\text{C}$  NMR spectra for **5d**

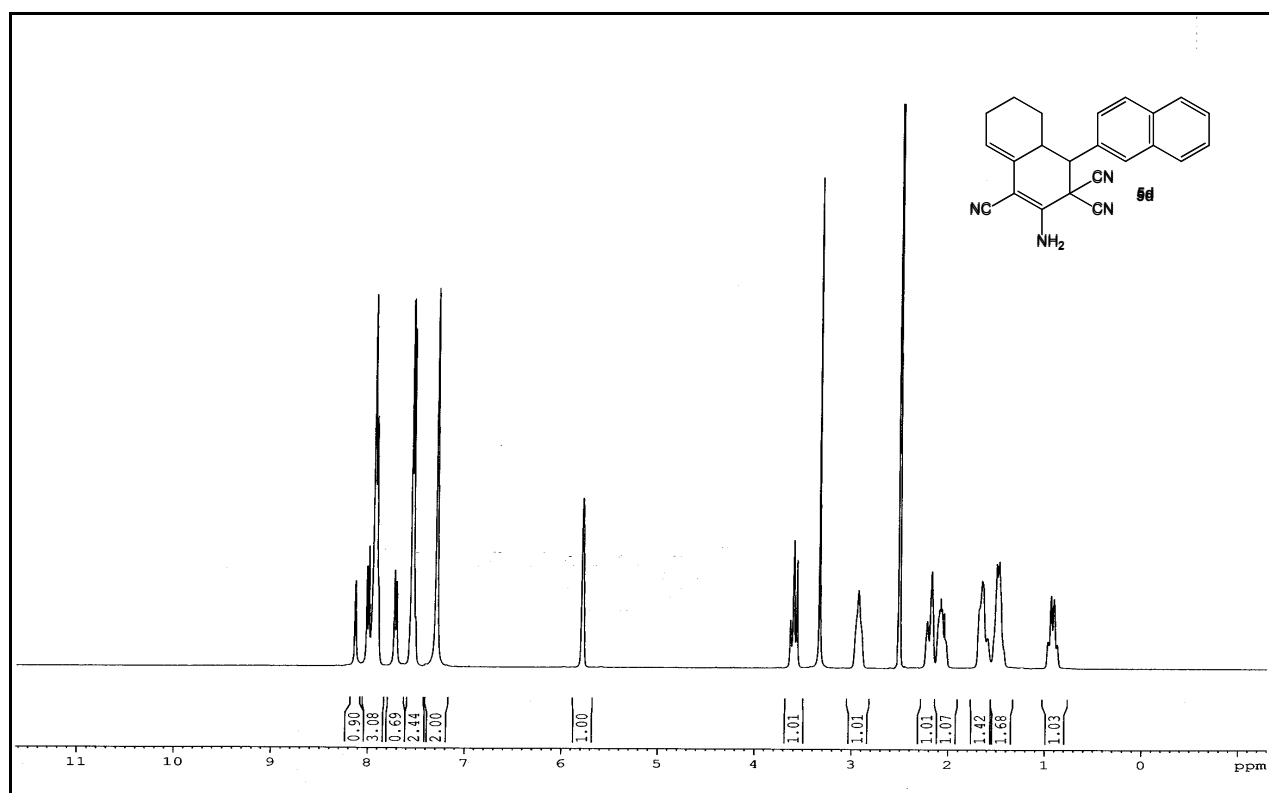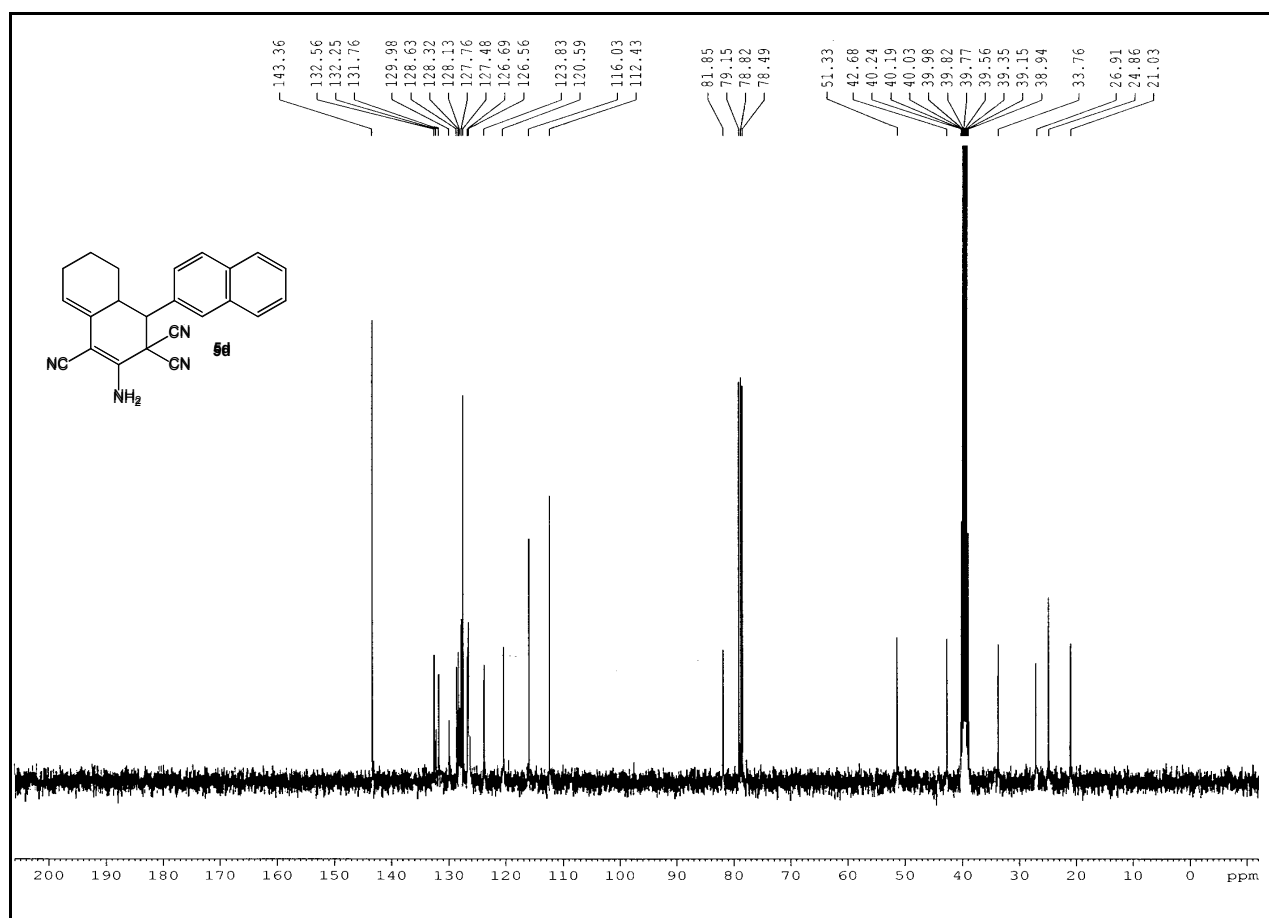

$^1\text{H}$  and  $^{13}\text{C}$  NMR spectra for **6a**

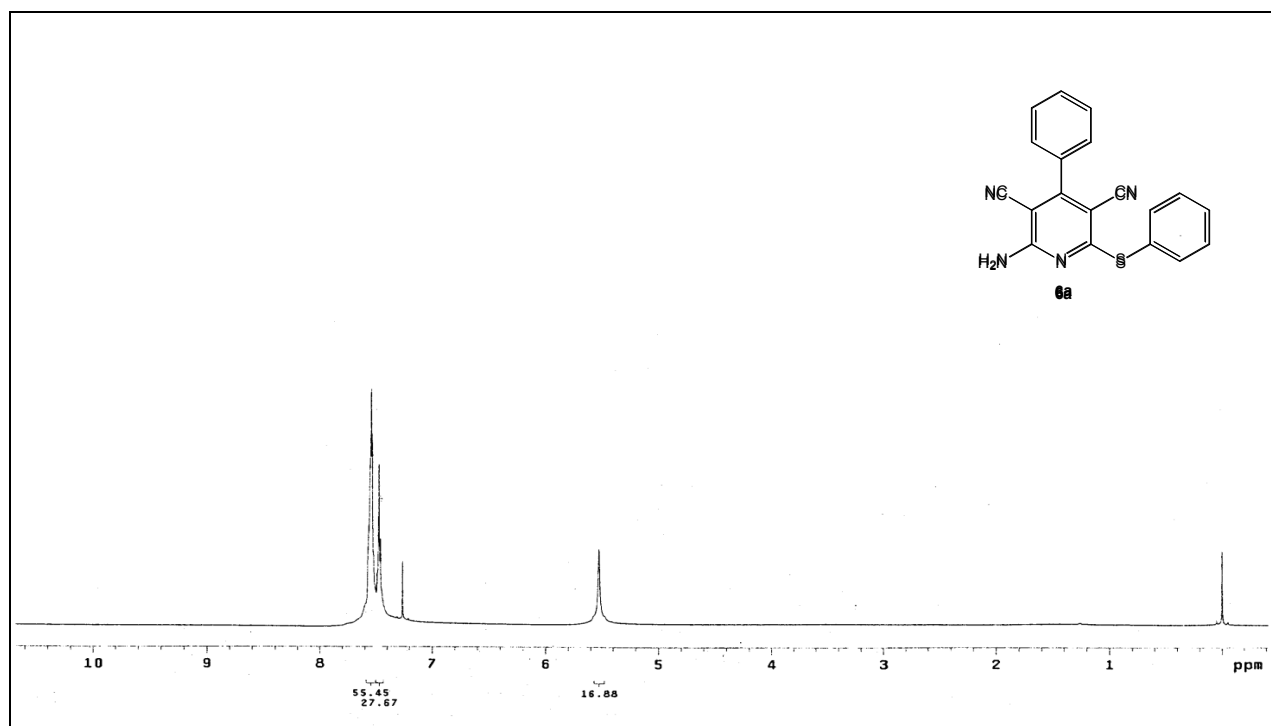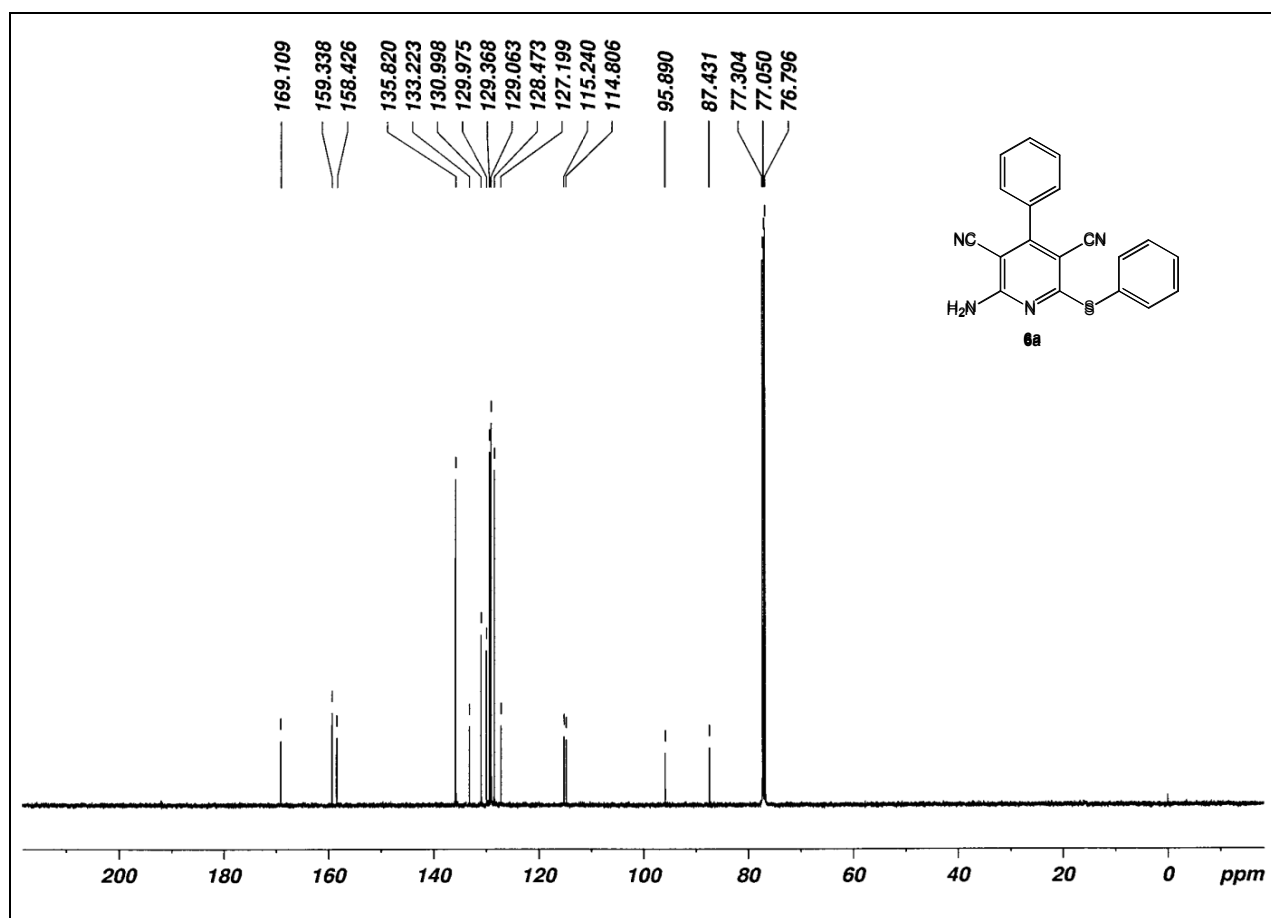

$^1\text{H}$  and  $^{13}\text{C}$  NMR spectra for **6b**

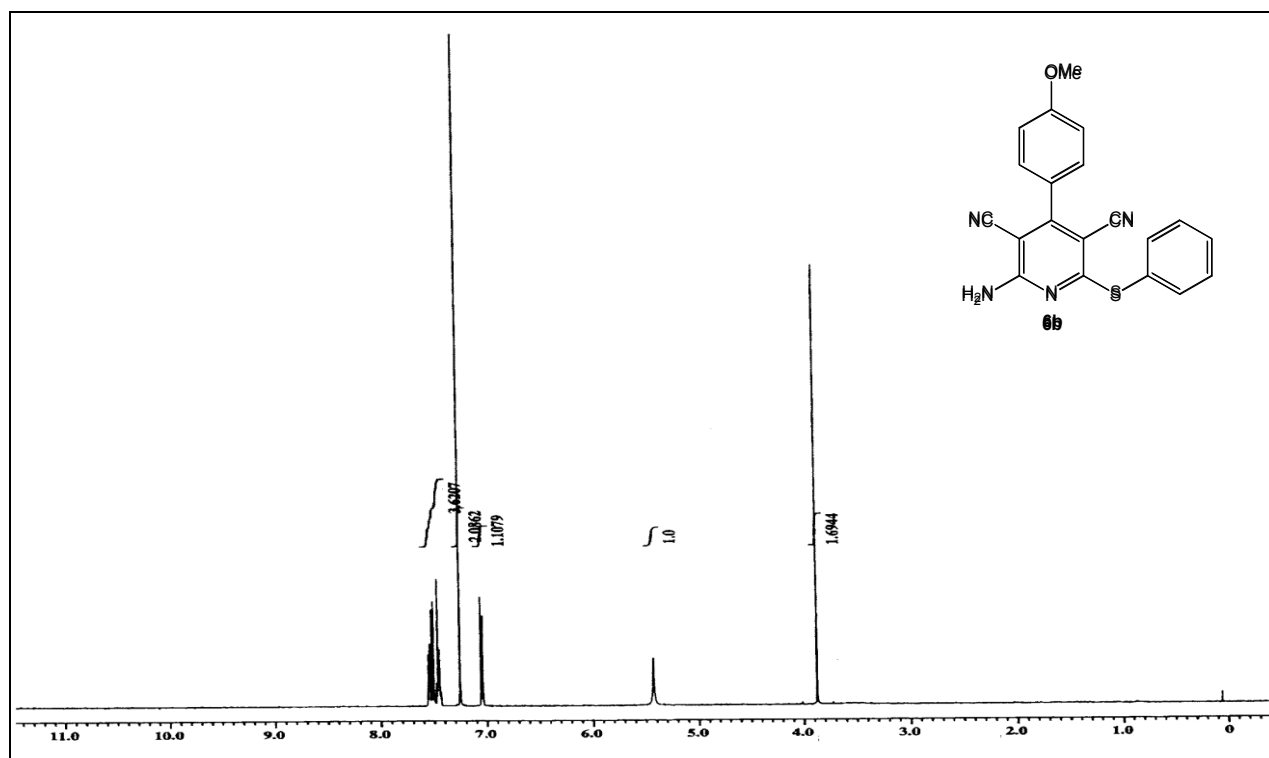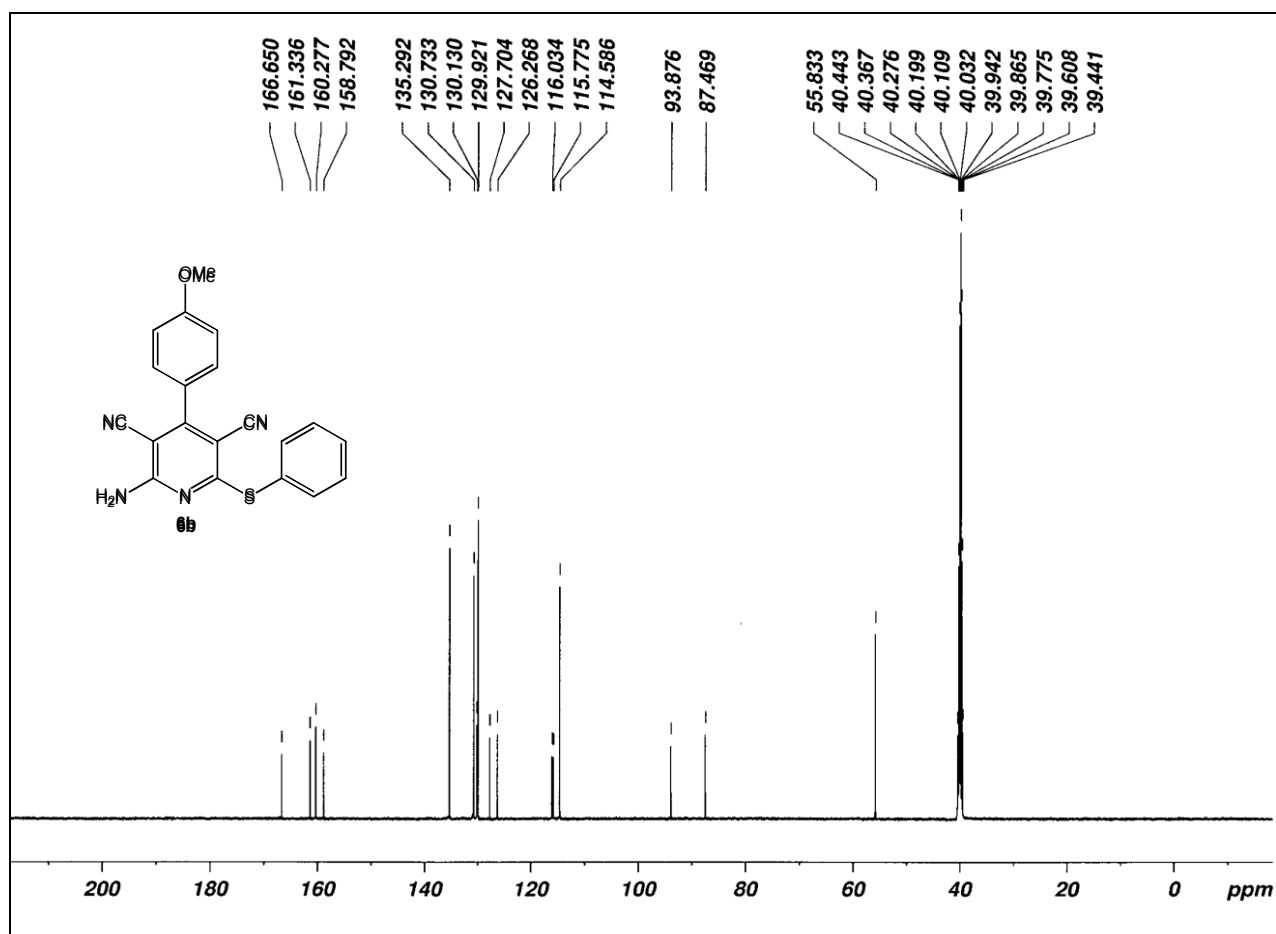



$^1\text{H}$  and  $^{13}\text{C}$  NMR spectra for **6d**

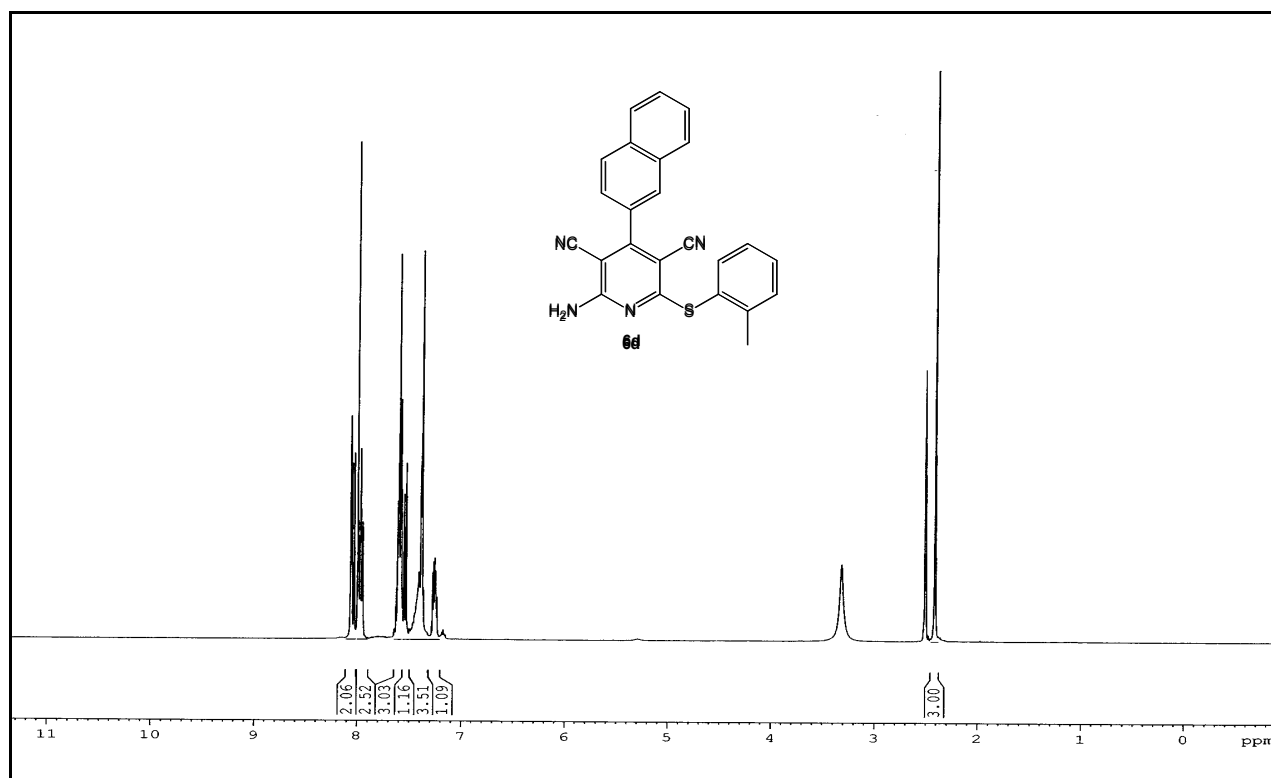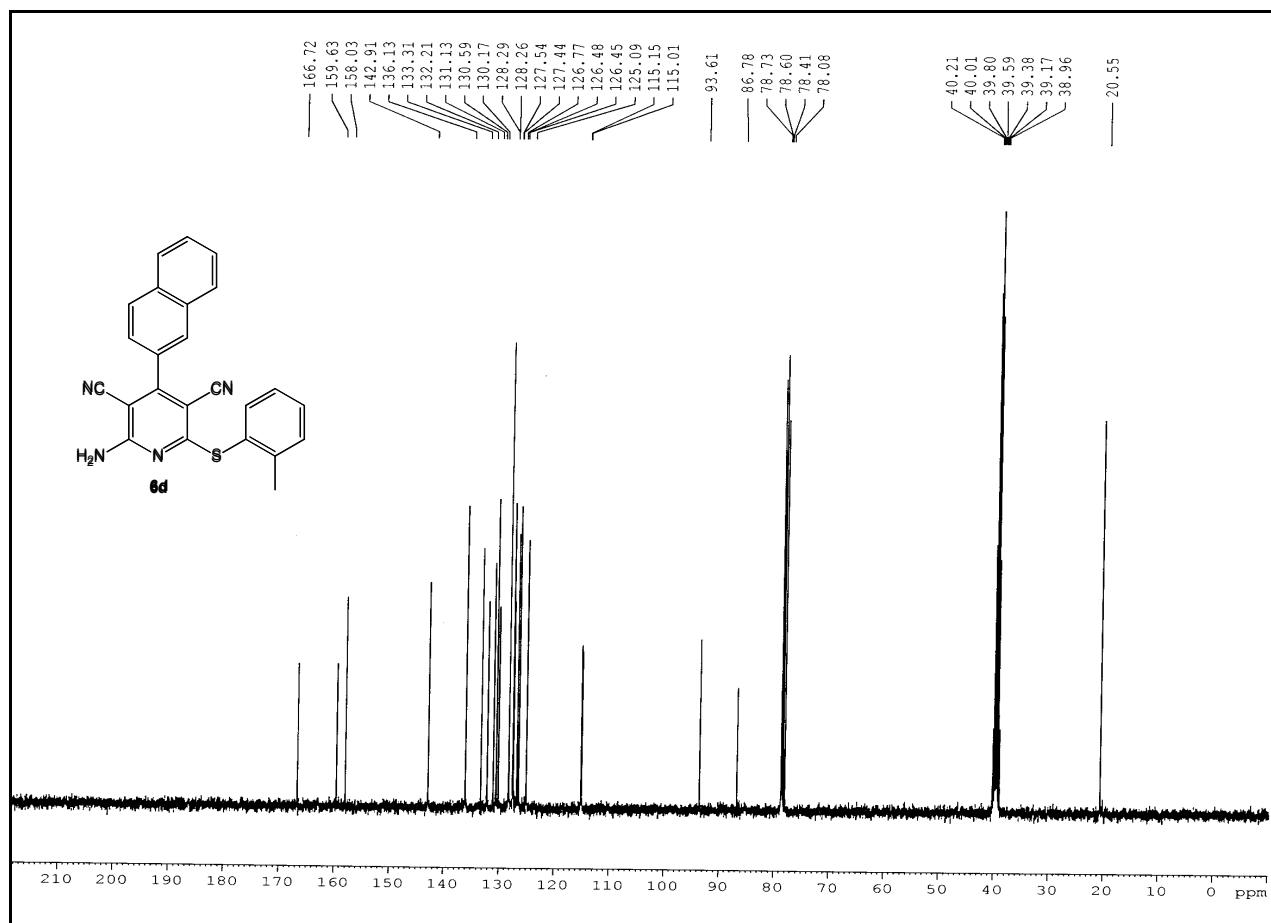

$^1\text{H}$  and  $^{13}\text{C}$  NMR spectra for **6e**

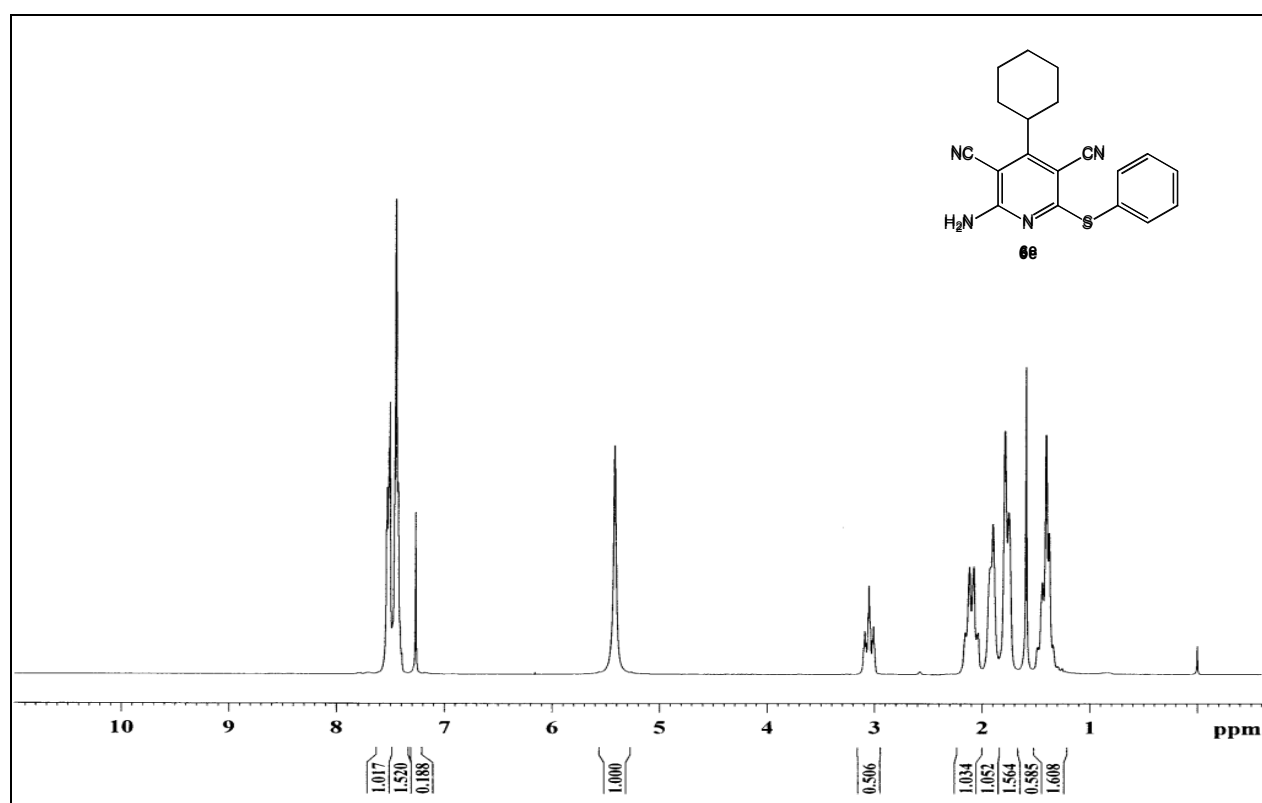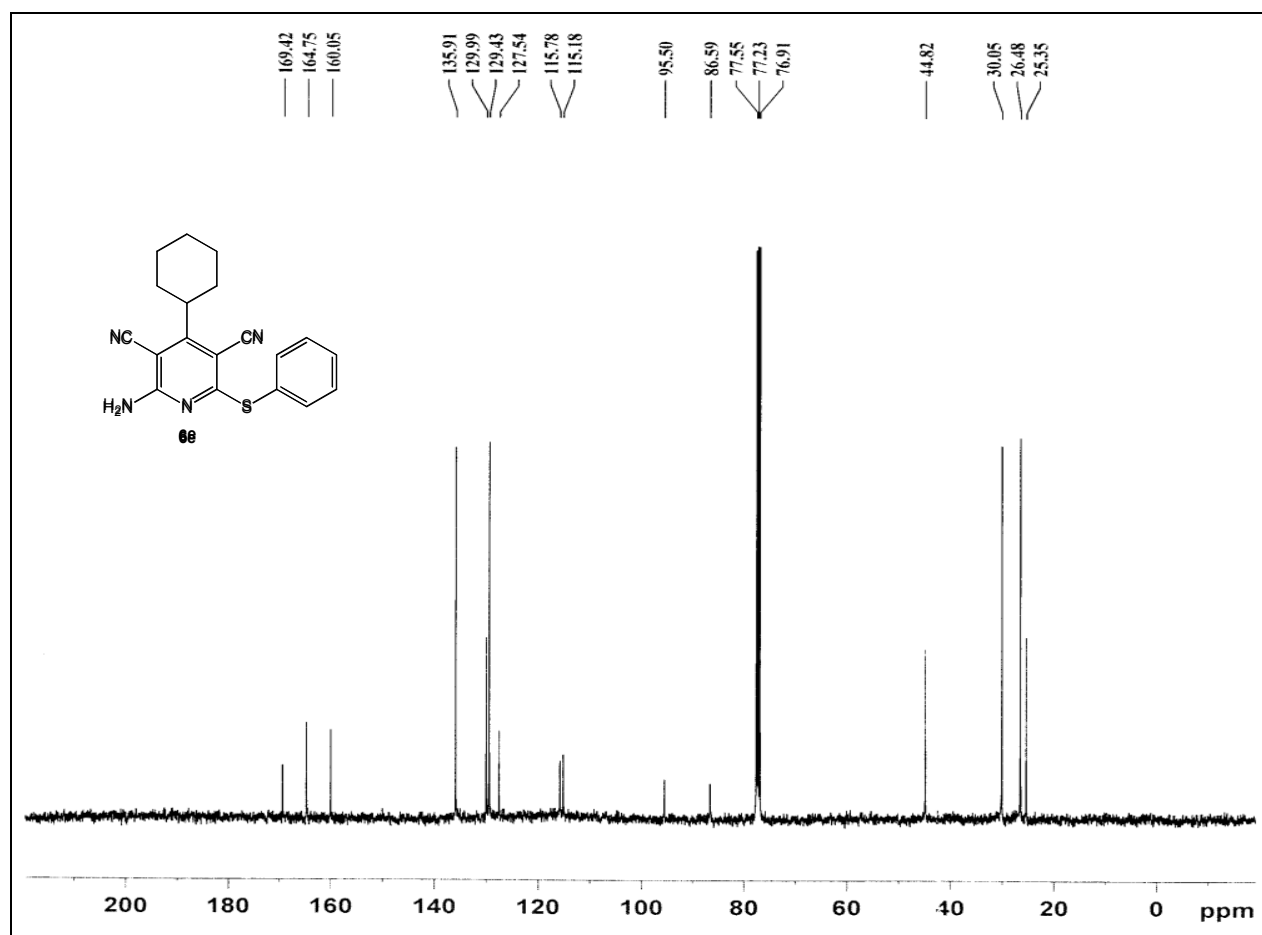

$^1\text{H}$  and  $^{13}\text{C}$  NMR spectra for **6f**

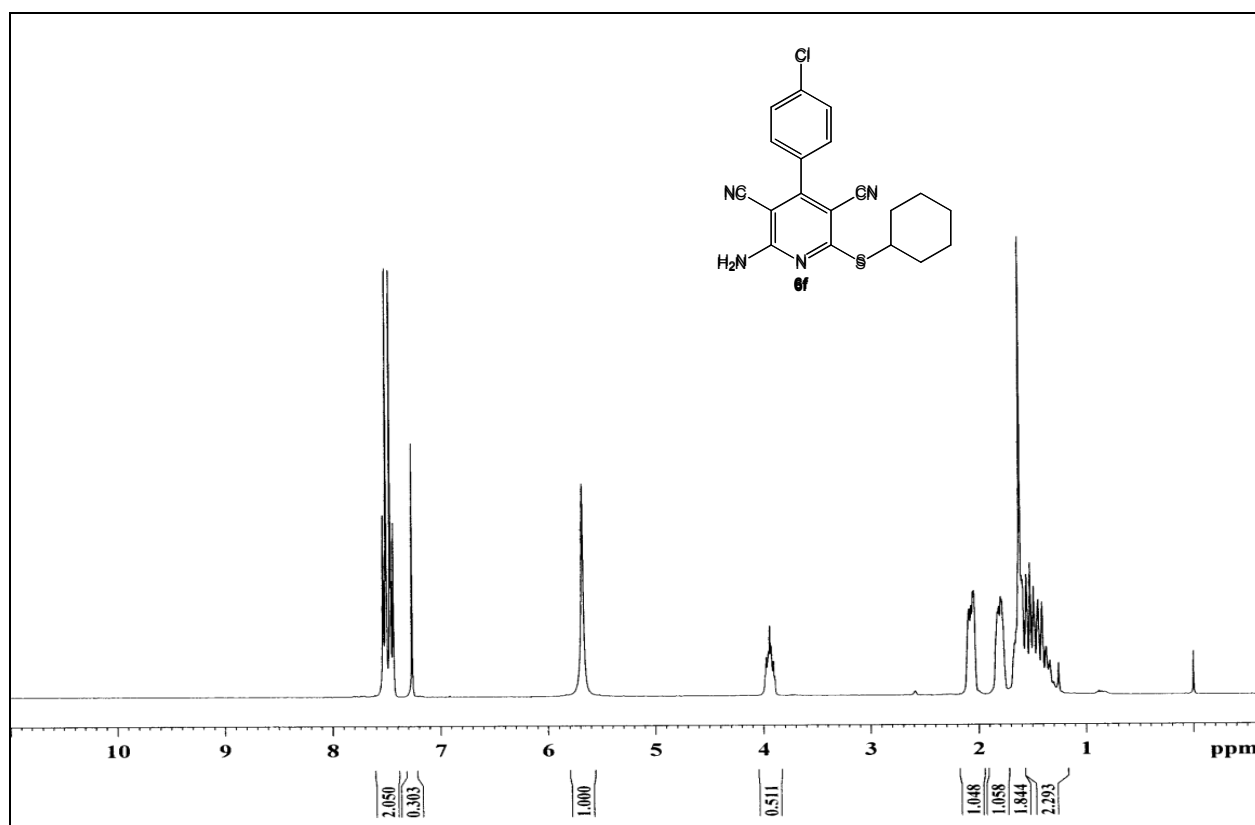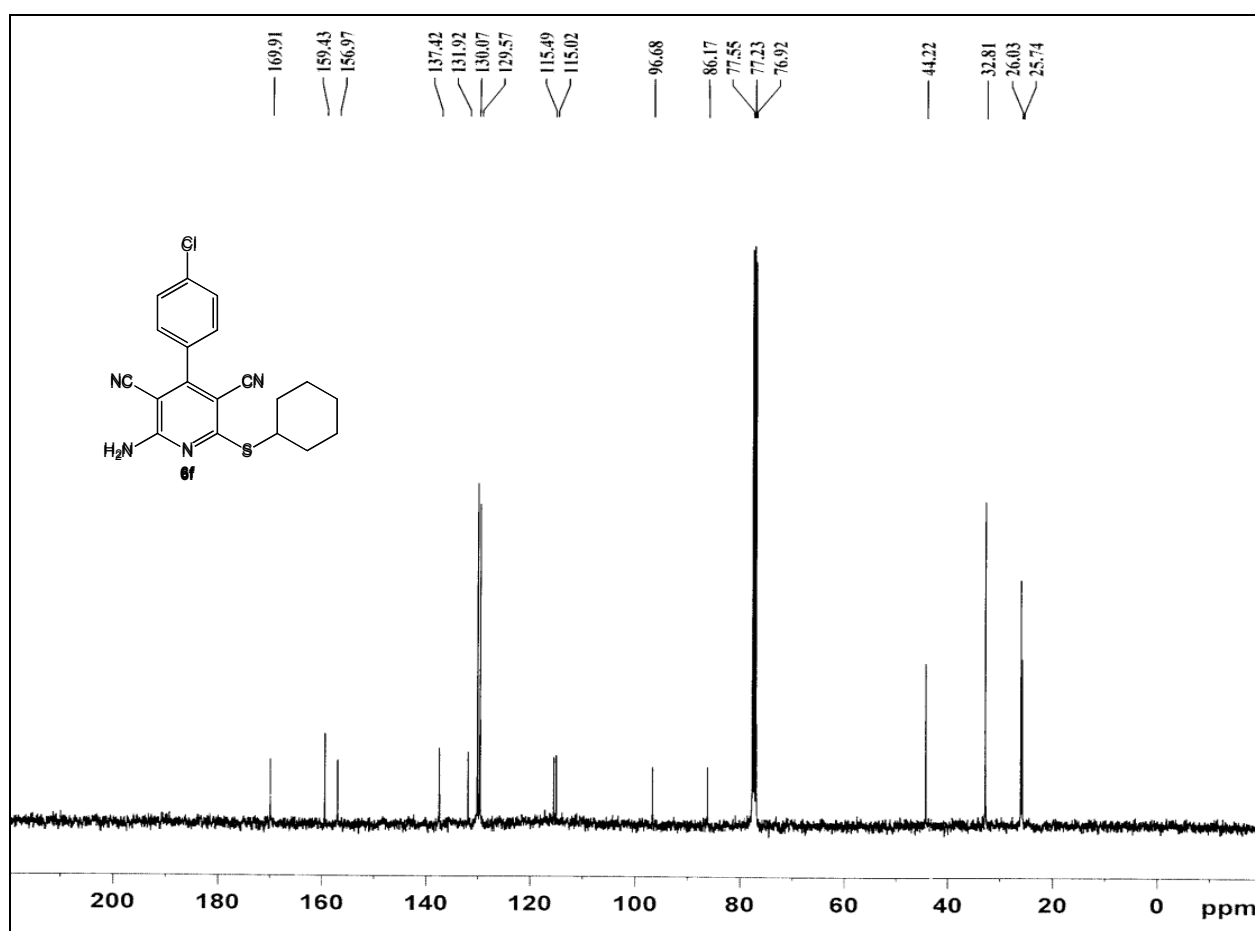

Supplement: c3ra45252b.pdf [file c3ra45252b.pdf]
